17 **Abstract:**

18 Spotted fever group *Rickettsia* species are arthropod-borne obligate intracellular  
19 bacteria that can cause mild to severe human disease. These bacteria invade host  
20 cells, replicate in the cell cytosol, and then spread from cell to cell. To access the host  
21 cytosol and avoid detection by immune surveillance mechanisms, these pathogens  
22 must have evolved efficient ways to escape membrane-bound vacuoles. Although  
23 *Rickettsia* are predicted to express factors that disrupt host membranes, little is known  
24 about how and when these proteins function during infection. Here, we investigated the  
25 role of a *Rickettsia* patatin-like phospholipase A2 enzyme (Pat1) during host cell  
26 infection by characterizing a *Rickettsia parkeri* mutant with a transposon insertion in the  
27 *pat1* gene. We show that Pat1 is important for infection in a mouse model and in host  
28 cells. We further show that Pat1 is critical for efficiently escaping from the single and  
29 double membrane-bound vacuoles into the host cytosol, and for avoiding host galectins  
30 that mark damaged membranes. In the host cytosol, Pat1 is important for avoiding host  
31 polyubiquitin, preventing recruitment of autophagy receptor p62, and promoting actin-  
32 based motility and cell-cell spread. Our results show that Pat1 plays critical roles in  
33 escaping host membranes and promoting cell-cell spread during *R. parkeri* infection and  
34 suggest diverse roles for patatin-like phospholipases in facilitating microbial infection.

35

36

37

38 **Importance:**

39 Spotted fever group *Rickettsia* are bacteria that reside in ticks and can be transmitted to  
40 mammalian hosts, including humans. Severe disease is characterized by high fever,  
41 headache, and rash, and results in occasional mortality despite available treatment.  
42 *Rickettsia* interact with host cell membranes while invading cells, escaping into the  
43 cytosol, and evading cellular defenses. Bacterial phospholipase enzymes have been  
44 proposed as critical factors for targeting host cell membranes, however the specific  
45 roles of rickettsial phospholipases are not well defined. We investigated the contribution  
46 of one conserved patatin-like phospholipase, Pat1, in *Rickettsia parkeri*. We observed  
47 that Pat1 is important for virulence in an animal model. Moreover, Pat1 plays critical  
48 roles in host cells by facilitating access to the cell cytosol, inhibiting detection by host  
49 defense pathways, and promoting cell-cell spread. Our study indicates that Pat1  
50 performs several critical functions, suggesting a broad role for phospholipases  
51 throughout the *Rickettsia* lifecycle.

## 52 **Introduction**

53           Spotted fever group (SFG) *Rickettsia* species are Gram-negative, obligate  
54 intracellular bacteria that infect tick vectors and can be transmitted by tick bites to  
55 vertebrate hosts (1). SFG *Rickettsia* that can cause disease in humans include *R.*  
56 *rickettsii*, the causative agent of Rocky Mountain spotted fever, a disease characterized  
57 by high fever, neurological symptoms, organ failure, and possible fatality if left untreated  
58 (2, 3). Disease-causing SFG *Rickettsia* also include species such as *R. parkeri*, which  
59 causes milder eschar-associated rickettsiosis characterized by fever and a skin lesion  
60 (eschar) at the site of the tick bite, but is not documented to cause fatality (2, 4, 5).  
61 Because *R. parkeri* can be studied under biosafety level 2 (BSL2) conditions, it is  
62 emerging as a model for understanding the molecular determinants of SFG *Rickettsia*  
63 pathogenicity.

64           *R. parkeri* targets macrophages (4-8) as well as endothelial cells (6, 7, 9) during  
65 infection in humans and animal models. Upon invasion of host cells, bacteria escape  
66 from the primary vacuole into the cytosol, where they replicate (10, 11). Bacteria then  
67 initiate actin-based motility and move to the plasma membrane, where they enter into  
68 protrusions that are engulfed into neighboring cells (12). This necessitates another  
69 escape event from a double-membrane secondary vacuole into the cytosol, completing  
70 the intracellular life cycle (10, 11). Other bacteria with a similar life cycle utilize pore-  
71 forming proteins and phospholipases to escape from the primary and/or secondary  
72 vacuole. For example, *Shigella flexneri* uses the IpaB-IpaC translocon to form pores that  
73 facilitate membrane rupture (13–18). *Listeria monocytogenes* utilizes the cholesterol-



74 dependent cytolysin listeriolysin O (LLO) (19–22) and two phospholipase C enzymes,  
75 PlcA and PlcB, to escape from primary and secondary vacuoles (19, 23–27). It is likely  
76 that *Rickettsia* also utilizes at least one protein that can directly disrupt the vacuolar  
77 membrane to mediate escape.

78 SFG *Rickettsia* genomes encode two types of phospholipase enzymes,  
79 phospholipase D (PLD) and up to two patatin-like phospholipase A2 (PLA2) enzymes  
80 (Pat1 and Pat2) (28, 29). PLD is dispensable for vacuolar escape, as a *pld* mutant in *R.*  
81 *prowazekii* showed no delay in escape (30), even though exogenous PLD expression in  
82 *Salmonella enterica* was sufficient to facilitate escape (31). In contrast, evidence suggests  
83 a possible role for PLA2 enzymes in escape. For example, PLA2 activity from *R.*  
84 *prowazekii* was demonstrated to target host phospholipids throughout infection (32, 33).  
85 Furthermore, pretreatment of bacteria with either a PLA2 inhibitor, or anti-Pat1 or anti-  
86 Pat2 antibodies, reduced plaque number for both *R. rickettsii* (34–36) and *R. typhi* (28,  
87 37), and increased colocalization of *R. typhi* with the lysosomal marker LAMP-1 (37). This  
88 suggests that Pat1 and Pat2 are important for infection and avoidance of trafficking to the  
89 lysosome. Nevertheless, the precise role of PLA2 enzymes in rickettsial vacuolar escape  
90 has remained unclear.

91 Phospholipase activity and escape from the vacuole may also be important to  
92 enable downstream life cycle events, such as actin-based motility, which requires access  
93 to actin in the host cell cytosol. Another is avoidance of anti-bacterial autophagy (also  
94 called xenophagy). Autophagy can be initiated via polyubiquitination of cytosolic bacteria  
95 (38–40) and subsequent recruitment of autophagy receptors (41) such as

96 p62/Sequestome 1 (SQSTM1) (hereafter referred to as p62) (42–44) and NDP52 (nuclear  
97 dot protein 52 (NDP52)/calcium-binding and coiled-coil domain 2 (CALCOCO2))  
98 (hereafter referred to as NDP52) (42, 45, 46). Autophagy receptors recognize  
99 polyubiquitinated bacteria and interact with microtubule-associated protein 1A/1B-light  
100 chain 3 (LC3), which marks nascent and mature autophagosomal membranes that can  
101 enclose bacteria and deliver them to the lysosome (38, 47, 48). Bacterial phospholipases  
102 may facilitate autophagy avoidance through manipulation of phospholipids needed for  
103 autophagosome formation, such as with *L. monocytogenes* PlcA targeting of  
104 phosphatidylinositol 3-phosphate (PI(3)P) to block LC3 lipidation (49, 50).

105         Autophagy can also be initiated by membrane damage to the bacteria-containing  
106 vacuole, which exposes glycans internalized from the host cell surface that are  
107 recognized by host cytosolic glycan-binding galectin (Gal) proteins (51). Gal3 and Gal8  
108 can target damaged vacuolar compartments during infection with *L. monocytogenes* (52,  
109 53) and *S. flexneri* (52, 54, 55), as well as during infection with bacteria that typically  
110 reside in membrane-bound compartments such as *Legionella pneumophila* (56), *S.*  
111 *enterica* (52, 55), *Coxiella burnetti* (57), and *Mycobacterium tuberculosis* (58).  
112 Importantly, membrane remnants marked by Gal3 or Gal8 colocalize with polyubiquitin  
113 (54, 58, 59), autophagy receptors p62 (54, 58) and NDP52 (55, 57), and LC3 (54, 55, 57,  
114 58). Nevertheless, it remains unknown if rickettsial phospholipases are important to evade  
115 autophagy.

116         To better understand the role of PLA2 enzymes during SFG *Rickettsia* infection,  
117 we characterized a *R. parkeri* mutant with a transposon insertion in the single PLA2-

118 encoding gene *pat1*. We found that Pat1 is critical throughout infection for escaping host  
119 membranes, avoiding targeting by autophagy, and spreading to neighboring cells. These  
120 results suggest that Pat1 is a key bacterial factor involved in interacting with host  
121 membranes and avoiding detection in host cells.

122

123

## 124 **Results:**

### 125 **Pat1 is important for infection of host cells and contributes to virulence in mice**

126 To determine the role of Pat1 during infection, we used a *R. parkeri* mutant with a  
127 transposon insertion in the *pat1* gene (*pat1::Tn*) that was previously isolated in a screen  
128 for mutants with reduced plaque size (60). We complemented the *pat1::Tn* mutation by  
129 generating a strain (*pat1::Tn pat1<sup>+</sup>*) that contains a second transposon encoding full  
130 length *pat1* plus the intergenic regions immediately 5' and 3' to the gene (predicted to  
131 contain the native promoter and terminator) (**Fig. 1A**). Using an antibody that recognizes  
132 *R. parkeri* Pat1 by western blotting, we observed a band at the predicted molecular weight  
133 of 55 kD for Pat1 in WT bacteria, no corresponding band in the *pat1::Tn* mutant, and a  
134 restoration of the band in the *pat1::Tn pat1<sup>+</sup>*-complemented mutant (**Fig. 1B**). The  
135 absence of detectable Pat1 protein in the mutant suggests it is a null mutant. Because  
136 the *pat1::Tn* mutant was initially identified based on its small-plaque phenotype, we next  
137 compared plaque area for WT, mutant, and complemented mutant strains. In comparison  
138 with WT, the *pat1::Tn* mutant showed significantly smaller plaques, and plaque area was

139 rescued in the complemented mutant (**Fig. 1C, D**). This demonstrates that the observed  
140 reduction in plaque area was caused by loss of *pat1*.

141 To further determine if Pat1 plays a role in bacterial replication, growth curves  
142 measuring PFU were performed in human microvascular endothelial cells (HMECs).  
143 There were no differences in bacterial replication kinetics for WT, *pat1::Tn* and *pat1::Tn*  
144 *pat1<sup>+</sup>*-complemented strains in HMECs (**Fig. 1E**). These data indicate that the transposon  
145 disruption of *pat1* does not interfere with intracellular growth in these cell lines.

146 We next examined the contribution of Pat1 to virulence *in vivo* using mice lacking  
147 the receptors for both IFN-I (*Ifnar1*) or IFN- $\gamma$  (*Ifngr1*) (*Ifnar1<sup>-/-</sup>;Ifngr1<sup>-/-</sup>* double knock out  
148 mice), which succumb to infection with WT *R. parkeri* and can be used to investigate the  
149 importance of bacterial genes to virulence (8, 61). Mice infected intravenously (i.v.) with  
150  $5 \times 10^6$  PFU WT bacteria showed a rapid drop in temperature and body weight following  
151 infection and did not survive past day 8 (**Fig 1F, G, H**). In contrast, mice infected i.v. with  
152 the *pat1::Tn* mutant maintained a steady temperature following infection, showed an initial  
153 drop in weight that stabilized around 2 weeks post infection before increasing, and the  
154 majority survived until the end of the experiment (day 40) (**Fig. 1F, G, H**). These results  
155 indicate that Pat1 is an important virulence factor.

156

### 157 **Pat1 promotes efficient escape from the vacuole post-invasion**

158 Because *R. typhi* Pat1 and Pat2 had previously been implicated in avoidance of  
159 trafficking to lysosomes (37), we sought to determine if the *R. parkeri pat1::Tn* mutant  
160 was impaired in its ability to escape from the primary vacuole during infection. To evaluate

161 the role of Pat1 in vacuolar escape, we used transmission electron microscopy (TEM) to  
162 investigate whether host membranes surrounded intracellular bacteria 1 h post infection  
163 (hpi) in HMECs. This time point was chosen because prior studies reported escape from  
164 the vacuole by 30 min post infection (mpi) for *R. typhi* (37), *R. prowazekii* (30), and *R*  
165 *conorii* (62). At this timepoint, significantly more WT bacteria were found free in the cytosol  
166 (74%) compared with the *pat1::Tn* mutant (38%) (**Fig. 2A, B**). Moreover, significantly  
167 fewer WT bacteria were found within membranes (25% in single membranes, 1% in  
168 double membranes) in comparison with the *pat1::Tn* mutant (50% in single membranes,  
169 12% within double membranes). Differences in vacuolar localization were not due to  
170 differences in invasion of host cells, as both WT and the *pat1::Tn* mutant entered cells  
171 with similar kinetics (**Fig. 2C**). These results suggest that Pat1 facilitates escape from  
172 membranes following invasion.

173 We further hypothesized that the increased localization of the *pat1::Tn* mutant  
174 within membranes impaired access to the cytosol, particularly to the pool of actin,  
175 interfering with actin-based motility. To test this hypothesis, we quantified the number of  
176 bacteria with actin tails at 30 mpi and 1 hpi. Approximately 3-4% of WT bacteria were  
177 associated with actin tails, in keeping with previous reports (63, 64). The frequency of  
178 *pat1::Tn* mutant association with actin tails was half that of WT at both time points (**Fig.**  
179 **2D**). These results suggest that failure of the *pat1::Tn* mutant to escape from the vacuole  
180 leads to reduction in actin-based motility. To confirm that the reduced frequency of actin-  
181 based motility resulted from bacteria being trapped within membranes, we used hypotonic  
182 shock (alternating treatment with hypertonic and then hypotonic solutions) to lyse primary

183 vacuoles (65, 66) and more efficiently deliver bacteria to the cytosol. When cells infected  
184 with WT bacteria were subjected to hypotonic shock at 5 mpi, there was no significant  
185 increase in the percentage of bacteria with actin tails at 30 mpi, suggesting that WT  
186 bacteria optimally access the cytosol following invasion (**Fig. 2E**). In contrast, hypotonic  
187 shock significantly increased the percentage of *pat1::Tn* mutant bacteria with actin tails.  
188 These results confirm that reduced frequency of actin-based motility in the *pat1::tn* mutant  
189 is due to entrapment in the primary vacuole.

190

### 191 **Pat1 contributes to autophagy avoidance**

192 The presence of a marked fraction (12%) of *pat1::Tn* mutant bacteria in double-  
193 membrane compartments at 1 hpi could not be explained by failure to escape from the  
194 vacuole, suggesting the possibility that bacteria were targeted by host cell autophagy.  
195 Because an initial step of anti-bacterial autophagy is recognition and ubiquitylation of the  
196 bacterial surface (40), we first tested for bacterial association with polyubiquitin in infected  
197 HMECs at 0-2 hpi. Whereas fewer than 2% of WT bacteria were polyubiquitin-positive  
198 from 0-2 hpi, the percentage of polyubiquitin-positive *pat1::Tn* mutant bacteria was  
199 significantly higher and increased (from about 6% at 0 hpi to about 16% at 1 hpi), before  
200 falling slightly (**Fig. 3A, B**). Complementation of the *pat1::Tn* mutant reduced the percent  
201 of polyubiquitin-positive bacteria to levels seen with WT (**Fig. 3C**). This suggests that Pat1  
202 reduces recognition of bacteria by the host ubiquitylation machinery.

203 To further examine whether bacteria were targeted by the autophagy machinery,  
204 we examined the recruitment of autophagy receptors p62 and NDP52, as well as LC3 at

205 1 hpi, the time point with the most polyubiquitin-positive bacteria. Compared with WT  
206 (fewer than 2% stained with these markers), markedly more of the *pat1::Tn* mutant were  
207 positive for p62 (10%) and NDP52 (6%) (**Fig. 4A, B, C**). Moreover, more of the *pat1::Tn*  
208 mutant bacteria colocalized with LC3 at 1 and 2 hpi (**Fig. 4D, E**). Interestingly, the  
209 increased recruitment of LC3 to the *pat1::tn* mutant preceded increased colocalization of  
210 the mutant with LAMP-1, a marker for late endosomal and lysosomal compartments (**Fig.**  
211 **S1A, B**). These results suggest that Pat1 is important for counteracting the recruitment  
212 of autophagy receptors and targeting to autophagosomes and lysosomes.

213 Because previous studies suggested that Pat1 is secreted into the host cell (37),  
214 we also sought to further ascertain whether Pat1 was counteracting ubiquitylation and  
215 targeting by the autophagy machinery by acting locally on the bacterium producing the  
216 protein, and/or by acting at a distance on other bacteria. To test this, we co-infected  
217 HMECs with WT bacteria expressing 2xTagBFP and with *pat1::Tn* mutant bacteria, and  
218 quantified colocalization of *pat1::Tn* bacteria with polyubiquitin, NDP52, and p62. The  
219 *pat1::Tn* mutant exhibited significantly reduced colocalization with polyubiquitin and p62  
220 (but not NDP52) in co-infected cells compared with cells infected with the *pat1::Tn* mutant  
221 only (**Fig. 4F**). These results suggest that Pat1 is secreted and can function at a distance  
222 to reduce bacterial targeting with polyubiquitin and p62.

223

224 **Pat1 antagonizes bacterial association with damaged membranes that recruit Gal3**  
225 **and NDP52**

226           It remained unclear whether polyubiquitin and the autophagy machinery were  
227 associated with bacteria enclosed in damaged vacuolar membranes or those free in the  
228 cytosol. To determine whether polyubiquitin, NDP52, and p62 were present at damaged  
229 vacuoles at 1 hpi, we quantified the percentage of bacteria staining for polyubiquitin,  
230 NDP52, or p62, in cells transiently expressing Gal3-mCherry or Gal8-mCherry to mark  
231 damaged membranes (52, 55) (**Fig. 5A, B**). A small fraction (0.5%) of WT bacteria  
232 colocalized with Gal3-mCherry or Gal8-mCherry, whereas significantly more *pat1::tn*  
233 mutant bacteria colocalized with Gal3-mCherry or Gal8-mCherry (~2.5%) (**Fig. 5C, D**). A  
234 significantly higher fraction of the *pat1::Tn* mutant bacteria that stained for NDP52 also  
235 colocalized with either Gal protein (~50%) (**Fig. 5E**). Some *pat1::Tn* mutant bacteria that  
236 stained for p62 also colocalized with Gal3-mCherry (~5%) or Gal8-mCherry (~10%) (**Fig.**  
237 **5E**). We rarely observed colocalization of the *pat1::Tn* mutant bacteria with both  
238 polyubiquitin and either Gal protein (**Fig. 5E**). Interestingly, although the *pat1::Tn* mutant  
239 was more frequently associated with Gal3-mCherry or Gal8-mCherry, in *pat1::Tn* mutant-  
240 infected cells we observed fewer clusters of Gal3-mCherry (**Fig. S2A, C**) or Gal8-mCherry  
241 (**Fig. S2B, D**) not associated with bacteria, consistent with reduced overall membrane  
242 damage compared with cells infected with WT bacteria.

243           To test whether NDP52 associated with bacteria or damaged membranes, we  
244 performed the hypotonic shock treatment (**Fig. 2E**) to release bacteria from host  
245 vacuoles. Cells infected with WT and *pat1::Tn* bacteria were subjected to hypotonic shock  
246 treatment at 5 mpi, and then at 30 mpi, we quantified the number of bacteria that  
247 colocalized with NDP52. Hypotonic shock significantly reduced the percent colocalization



248 of the *pat1::Tn* with NDP52 (from ~6% in untreated cells to ~1% in treated cells), while  
249 fewer than 1% of WT bacteria colocalized with NDP52 regardless of treatment (**Fig. 5F**).  
250 Together, these results support the conclusion that Pat1 promotes efficient escape from  
251 vacuolar membranes and enables avoidance of targeting by Gal3, Gal8, and NDP52.

252

### 253 **Pat1 facilitates actin-based motility and spread into neighboring cells late in** 254 **infection**

255 Although Pat1 is dispensable for bacterial replication kinetics, it promotes plaque  
256 formation, suggesting that Pat1 may function in cell-cell spread. To initially assess if Pat1  
257 is important for spread, we used an infectious focus assay, in which the number of  
258 infected host cells per focus of infection was quantified at 28 hpi to measure spread  
259 efficiency (67). Compared with WT bacteria (~4.5 cells per focus), the *pat1::Tn* mutant  
260 infected significantly fewer cells (~3.5 cells per focus) (**Fig. 6A, B**). This suggested that  
261 Pat1 is important for spread. To further assess cell-cell spread, we carried out a “mixed  
262 cell” assay (67) in which “primary” A549 cells stably expressing the TagRFP-T-farnesyl  
263 plasma-membrane marker (A549-TRTF) were infected for 1 h, detached from the plate,  
264 and mixed with unlabeled “secondary” A549 cells (**Fig. 6C, D**). The percent of bacteria in  
265 the primary A549-TRTF cell and secondary cell were quantified at 32 hpi. We observed  
266 that 50% of WT bacteria were found in primary cells and 50% had spread into secondary  
267 cells. In contrast, ~85% of *pat1::Tn* mutant bacteria remained in primary cells and only  
268 ~15% had spread to secondary cells (**Fig. 6C, E**). This confirms that Pat1 is important for  
269 cell-cell spread.

270           Because our data indicated that Pat1 facilitates cell-cell spread, we further  
271 investigated whether Pat1 influences actin-based motility, which is known to contribute to  
272 spread (63, 64). We found that the *pat1::Tn* mutant formed significantly fewer actin tails  
273 compared to WT bacteria at 24 hpi and 48 hpi (**Fig. 6F, G**), suggesting fewer bacteria  
274 initiated actin-based motility. Complementation of the *pat1::Tn* (*pat1::Tn pat1+*) mutant  
275 restored the frequency of actin tail formation to WT levels (**Fig. S3A, B**). In the mixed cell  
276 assay, which distinguishes between primary and secondary cells, ~6% of WT bacteria in  
277 the primary cell assembled actin, mostly as actin tails but also as “clouds” of actin  
278 surrounding the bacteria, compared with ~1% of *pat1::Tn* mutant bacteria (**Fig. S3C**).  
279 Differences between WT and *pat1::Tn* bacteria in the secondary cell could not be  
280 discerned. The observed differences between WT and the *pat1::Tn* mutant were not due  
281 to differences in the localization of the *R. parkeri* protein Sca2, which is important for  
282 actin-based motility and cell-cell spread (64, 68) (**Fig. S3D**). Taken together, these results  
283 suggest that Pat1 is important for the frequency of bacterial actin-based motility, and  
284 hence bacterial spread to neighboring cells.

285

### 286 **Pat1 is important for avoiding double membranes during cell-cell spread**

287           Because Pat1 played an important role escaping the primary vacuole following  
288 invasion, we hypothesized that it also played a role in escaping the secondary vacuole  
289 following cell-cell spread. To test this, we imaged infected HMECs by TEM at 48 hpi and  
290 quantified the percent of intracellular bacteria free in the cytosol or within membranes.  
291 Significantly more *pat1::Tn* mutant bacteria were surrounded by double membranes

292 (~60%) in comparison with WT bacteria (~25%) (**Fig. 7A, B**). The double membranes we  
293 observed were often discontinuous, with the mutant remaining mostly enclosed and WT  
294 bacteria having very few surrounding membrane fragments. This suggests that Pat1 plays  
295 a role in escaping from membranes later in infection.

296 We next sought to further distinguish whether bacteria surrounded by double  
297 membranes were in secondary vacuoles that result from cell-cell spread, or other double-  
298 membrane structures involved in autophagy. To determine targeting by autophagy at 48  
299 hpi, we assessed whether bacteria colocalized with polyubiquitin, p62 or NDP52 at 48  
300 hpi. Significantly more of the *pat1::Tn* mutant colocalized with p62 and NDP52 than WT,  
301 although the overall percentages were low in all cases (**Fig. 7C**). Moreover, the  
302 percentage of bacteria that colocalized with these markers was lower than at 1 hpi  
303 (compare with **Fig. 3B, 4C**). Interestingly, polyubiquitin labeling was not significantly  
304 different between WT and *pat1::Tn* mutant bacteria, suggesting the observed differences  
305 in colocalization with autophagy receptors p62 and NDP52 between WT and the *pat1::Tn*  
306 mutant were not mediated by differences in polyubiquitin recruitment. These data suggest  
307 that a minor fraction of double membranes observed by TEM at 48 hpi are  
308 autophagosomes and Pat1 plays a minor role in autophagy avoidance at late timepoints.

309 To determine whether there instead were differences in escape from secondary  
310 vacuole, we used the mixed cell assay described above, in which infected primary cells  
311 stably expressing TagRFP-T-farnesyl were infected for 1 h and then mixed with  
312 uninfected and unlabeled secondary cells (**Fig. 6C, D**). Fewer than 1% of WT bacteria  
313 that spread from primary into secondary cells were colocalized with the plasma

314 membrane marker from the primary cell (**Fig. 7D**), suggesting that these bacteria had  
315 escaped the secondary vacuole. In contrast, of the *pat1::Tn* mutant bacteria that spread  
316 into secondary cells, ~12% colocalized with the plasma membrane marker from the  
317 primary cell. These results suggest that a significant fraction of double-membrane  
318 structures seen in the TEM images are secondary vacuoles and confirm that Pat1 is  
319 important for escaping from these vacuoles.

320

321

## 322 **Discussion**

323         The ability of *Rickettsia* species to escape the vacuole and avoid host membranes  
324 is a critical facet of their life cycle. Here, we demonstrate that the *R. parkeri* patatin-like  
325 phospholipase, Pat1, is important for virulence in a mouse model of infection. At the  
326 cellular level, we find that Pat1 enables bacterial escape from host membranes  
327 throughout infection. Pat1 mediates efficient exit from primary vacuoles following  
328 invasion, helping *R. parkeri* avoid detection by host galectins and autophagy adaptor  
329 NDP52. Pat1 further enables cytosolic bacteria to avoid recruitment of polyubiquitin and  
330 autophagy adaptor p62. As infection progresses, Pat1 facilitates spread into neighboring  
331 cells and escape from the secondary vacuole. Altogether, these data suggest Pat1 is  
332 important at multiple steps of the *Rickettsia* life cycle that involve manipulating host  
333 membranes.

334         Our work shows that Pat1 is important for virulence upon i.v. infection in a mouse  
335 model that succumbs to *R. parkeri* infection (8, 61). This is consistent with other bacterial

336 factors involved in vacuolar escape being important virulence factors in animal models of  
337 disease. For example, *L. monocytogenes* mutants lacking LLO are avirulent upon i.v.  
338 infection in a mouse model and single *L. monocytogenes* PLC mutants are also  
339 diminished in virulence (27). Our data suggests that Pat1 plays an important role in *R.*  
340 *parkeri* pathogenesis.

341         Using TEM and confocal microscopy, we found that Pat1 mediates escape from  
342 both single and double membrane compartments in host cells. At early time points,  
343 *pat1::Tn* mutant bacteria were more frequently surrounded by single membranes  
344 following invasion, likely to be primary vacuoles derived from the host cell plasma  
345 membrane. Consistent with a failure to fully escape the primary vacuole, the *pat1::Tn*  
346 mutant also showed a reduced frequency of actin-based motility and increased trafficking  
347 to LAMP-1-positive compartments. We also found the *pat1::Tn* mutant had increased  
348 localization to double membrane structures at later time points when bacteria are  
349 spreading to neighboring cells. These structures are likely to be secondary vacuoles, as  
350 only a small portion colocalized with autophagy receptors p62 or NDP52. Pat1 was  
351 previously suggested as a candidate for escape from the vacuole due to its phospholipase  
352 activity (28, 37) and the observation that *R. typhi* pre-treated with anti-Pat1 antibody  
353 (which could block surface-associated but not secreted Pat1) caused increased  
354 colocalization with LAMP-1 (37). Our results provide genetic confirmation of this role.  
355 Several other bacterial phospholipases mediate membrane rupture (69), including *L.*  
356 *monocytogenes* PLCs (19, 26, 27, 69), *Clostridium perfringens* alpha-toxin (PLC) (69–  
357 71), and *Pseudomonas aeruginosa* ExoU (69, 72). Similarly, lecithin:cholesterol

358 acyltransferase (LCAT) enzymes from pathogenic protists, including *Plasmodium berghei*  
359 phospholipase (PbPL) (73, 74) and *Toxoplasma gondii* TgLCAT (75), have PLA2 and acyl  
360 transferase activity that facilitate breakdown of the parasitophorous vacuole.  
361 Phospholipases are also used by nonenveloped viruses to breach the endosome (76),  
362 including parvovirus capsid protein VP1 which has PLA2 activity (77), and host PLA2  
363 group XVI which is recruited by picornaviruses to endosomes for genome translocation  
364 (78). Thus, the role of Pat1 in vacuolar breakdown and escape is similar to functions of  
365 phospholipases in other intracellular pathogens.

366         Despite its importance in escaping from primary and secondary vacuoles, Pat1 is  
367 not important for growth in the cell line we tested, suggesting that other *R. parkeri* proteins  
368 help rupture vacuolar membranes and gain access to nutrients in the cytosol. Consistent  
369 with this notion, the *pat1::Tn* mutant colocalizes more frequently with damaged  
370 membranes marked by Gal3 and Gal8. Pat1 must therefore share functional redundancy  
371 with other proteins that also function in escape. This is similar to the redundancy between  
372 *L. monocytogenes* PLC enzymes, which also have overlapping roles in escape, with  
373 double mutants deficient in both PlcA and PlcB showing more severe defects in escape  
374 (19, 26, 27) and growth (27, 49) than single mutants. Other *Rickettsia* factor(s) involved  
375 in escape may include TlyC, a putative hemolysin (31, 79), which could function  
376 analogously to LLO. Pat2, a second PLP, may also have an overlapping role with Pat1 in  
377 species like *R. typhi* (28, 37). In addition to the membranolytic proteins, Risk-1, a  
378 phosphatidylinositol 3-kinase, was recently reported to manipulate early trafficking events  
379 important for invasion, vacuolar escape, and autophagy (80). Factors such as these are

380 likely to function with Pat1 to allow complete escape from vacuolar membranes into the  
381 cytosol.

382 A key role for Pat1 in promoting efficient escape from damaged host membrane  
383 remnants is to enable subsequent avoidance of targeting of these membranes by Gal  
384 proteins and the autophagy machinery. Consistent with this, we observed that the  
385 *pat1::Tn* mutant colocalizes more frequently with Gal3 or Gal8 and the autophagy  
386 receptor NDP52. Interestingly, Gal3, but not Gal8, has been found to promote *L.*  
387 *monocytogenes* replication during infection by suppressing autophagy (53). During Group  
388 *A Streptococcus* infection, Gal3 has also been shown to prevent recruitment of Gal8 and  
389 parkin, which themselves play anti-bacterial roles (81). Whether differential recruitment  
390 of Gal3 and Gal8 leads to different outcomes during *Rickettsia* infection remains  
391 unknown.

392 We found that Pat1 plays a role in avoiding targeting by autophagy for bacteria  
393 that are not associated with damaged membranes. In support of this notion, the *pat1::Tn*  
394 mutant was subject to polyubiquitylation and p62 recruitment without co-recruitment of  
395 Gal proteins. Pat1 may thus augment other rickettsial autophagy-avoidance mechanisms,  
396 which include lysine methylation of OmpB and OmpB-mediated shielding of bacterial  
397 surface from polyubiquitylation (82, 83). In this role, Pat1 might function in a similar  
398 manner to PlcA from *L. monocytogenes*, which reduces PI(3)P levels to block  
399 autophagosome formation and stall autophagy (49, 50). Both PlcA/B and Pat1 are  
400 secreted and can act at a distance, as it was previously shown that a *plcA/B* mutant can  
401 be rescued by co-infection with by WT *L. monocytogenes* (50), and we also observed

402 rescue of a *R. parkeri pat1::Tn* mutant by co-infection with WT bacteria. Thus, secreted  
403 Pat1 might also target early and/or regulatory aspects of autophagy.

404 We further found that Pat1 is important for cell-cell spread, including in late actin-  
405 based motility and escape from the secondary vacuole (the latter is discussed above).  
406 The *pat1::Tn* mutant formed fewer actin tails and exhibited reduced spread into  
407 neighboring cells when compared with WT, consistent with the known role for motility in  
408 cell-cell spread of SFG *Rickettsia* (63, 64, 68). One key contribution of Pat1 to actin-based  
409 motility is to mediate escape from the vacuole, allowing recruitment of the host actin  
410 machinery to the surface of the bacteria. However, it remains possible that Pat1 targeting  
411 of phosphoinositides (PIs) might also affect actin-based motility, as PIs influence the  
412 activity of actin-binding proteins (84–86). Moreover, Pat1 targeting of PIs at the plasma  
413 membrane could contribute to protrusion dynamics during cell-cell spread. PIs are  
414 implicated in the recruitment and function of the endocytic machinery (87–90). In turn,  
415 endocytic pathways have been shown to mediate protrusion engulfment for *L.*  
416 *monocytogenes* and *S. flexneri* (87, 88). Pat1-mediated local membrane damage might  
417 also promote spread, as *L. monocytogenes* LLO-mediated membrane damage in the  
418 protrusion has been shown to enable exploitation of efferocytosis for spread (89). Thus,  
419 Pat1 may play multiple roles in cell-cell spread.

420 Our data demonstrate that Pat1 plays important roles throughout the *R. parkeri*  
421 intracellular life cycle in escaping from membranes, avoiding autophagy, and enabling  
422 cell-cell spread. Whether Pat1 also performs other functions during infection remains  
423 unknown. For example, secreted Pat1 could contribute to the release of bioactive lipids



424 such as eicosanoids derived from arachidonic acid. Eicosanoid synthesis can impact  
425 immunity, inflammation, and vascular function (90–92), and thus represents an  
426 underexplored process that may be influenced by *Rickettsia* infection and disease.  
427 Membranes are critical hubs of signaling and protein-protein interactions and *R. parkeri*,  
428 like other intracellular pathogens, has likely evolved diverse ways of manipulating  
429 membranes. Further studies of Pat1 function will elucidate how PLA2 enzymes facilitate  
430 microbial adaptation to host cells and could reveal previously unappreciated strategies of  
431 membrane manipulation by bacterial pathogens.

432

433

## 434 **Materials and methods**

### 435 **Mammalian cell lines**

436 Mammalian cell lines were obtained from the UC Berkeley Cell Culture Facility and  
437 grown at 37°C with 5% CO<sub>2</sub>. Vero cells (African green monkey kidney epithelial cells,  
438 RRID:CVCL\_0059) were grown in Vero media (DMEM with high glucose (4.5 g/L; Gibco,  
439 catalog number 11965-092) and 2% FBS (GemCell, 100500) for culturing or 5% FBS for  
440 plaque assays (described below)). A549 cells (human lung epithelial cells,  
441 RRID:CVCL\_0023) were grown in A549 media (DMEM (Gibco, 11965-092) with high  
442 glucose (4.5 g/L) and 10% FBS (ATLAS, F-0500-A)). A549 cells stability expressing a  
443 farnesyl tagged TagRFP-T (A549-TRTF) to mark the plasma membrane were described  
444 previously (67) and were also maintained in A549 media. HMEC-1 cells (human  
445 microvascular endothelial cells RRID:CVCL\_0307) were grown in HMEC media (MCDB  
446 131 media (Sigma, M8537) supplemented with 10% FBS (HyClone, SH30088), 10 mM

447 L-glutamine (Sigma, M8537), 10 ng/ml epidermal growth factor (Corning, 354001), 1  
448 ug/mL hydrocortisone (Spectrum Chemical, CO137), and 1.18 mg/mL sodium  
449 bicarbonate).

450

## 451 **Plasmid construction**

452 For complementation of *pat1::Tn pat1+* mutant, we constructed a pMW1650-Spec-  
453 *pat1* complementation plasmid. The plasmid pMW1650-Spec was derived from  
454 pMW1650 (93) by deleting the gene encoding GFP and replacing the gene conferring  
455 resistance to rifampicin with the *aadA* gene from *E. coli* to confer resistance to  
456 spectinomycin (94). Nucleotides 901,999-903,853 from *R. parkeri* genomic DNA were  
457 then amplified by PCR and inserted into pMW1650-Spec at the single PstI site. Primers  
458 used to amplify this region (5'-  
459 ATTGCGACACGTACTCTGCAGATCTCATACCATCATAGTTATAATATTAGC-3' and 5'-  
460 AGAGGATCCCCATGGCTGCAGACACAGGTGTCGTCATTGTGA-3') contained 15-bp  
461 overhang with homology to the plasmid for InFusion (Takara Bio, 638947) cloning and  
462 retained the PstI site. The amplified sequence contained a predicted promoter 5' to the  
463 *pat1* coding sequence (determined using SoftBerry, BPROM prediction of bacterial  
464 promoters;  
465 <http://www.softberry.com/berry.phtml?topic=bprom&group=programs&subgroup=gfindb>)  
466 (95) and several predicted transcriptional terminators 3' to the *pat1* coding sequence  
467 (determined using WebGeSTer DB; <http://pallab.serc.iisc.ernet.in/gester/>) (96).

468 To express Pat1 in *E. coli* for antibody generation, the DNA sequence encoding  
469 full length *pat1* was amplified from *R. parkeri* genomic DNA by PCR and subcloned into  
470 a pET1 vector containing an N-terminal 6x His-tag, maltose binding protein (MBP) tag,  
471 and TEV cleavage site (Addgene plasmid #29656). Primers used for amplifying the insert  
472 (5'-TACTTCCAATCCAATGTAGATATAACAACAATAAGATTAGC-3' and 5'-  
473 TTATCCACTTCCAATGAGATAACCTTGTACATCATCTGTATGC-3') contained 15-bp  
474 overhang with homology to the plasmid for InFusion cloning (Takara Bio, 638947). The  
475 resulting plasmid, pET-M1-6xHis-MBP-TEV-Pat1, was transformed into *E. coli* strain  
476 BL21 codon plus RIL-Cam<sup>r</sup> (DE3) (UC Berkeley QB3 Macrolab).

477 To express Pat1 in *E. coli* for antibody affinity purification from rabbit sera, the DNA  
478 sequence encoding full length *pat1* was amplified from pET-M1-6xHis-MBP-TEV-Pat1 by  
479 PCR and subcloned into the pSMT3 plasmid containing a 6xHis-tag upstream of the  
480 SUMO tag (97). Primers used for amplifying insert (5'-  
481 CACAGAGAACAGATTGGTGGATCCATGGTAGATATAACAACAATAAGATTAG-3'  
482 and 5'-GTGGTGGTGGTGGTGTAACTCGAGGAGATAACCTTGTACATCATCTGTAT  
483 GC-3') contained 15-bp overhang with homology to the plasmid for InFusion cloning  
484 (Takara Bio, 638947). The resulting plasmid, pSMT3-6x-His-SUMO-Pat1, was  
485 transformed into *E. coli* strain BL21 codon plus RIL-Cam<sup>r</sup> (DE3) (UC Berkeley QB3  
486 Macrolab).

487 To make pmCherry-N1-Gal8, full-length Gal8 was amplified from PB-CAG-  
488 mRuby3-Gal8-P2A-Zeo (Addgene plasmid #150815) and subcloned into pmCherry-N1  
489 (Clontech, 632523). Primers used for amplifying insert were 5'-

490 ACCGCGGGCCCGGGATCCGCCACCATGATGTTGTCCTTAAACAACC-3' and 5'-  
491 GCGACCGGTGGATCCCCCAGCTCCTTACTTCCAGT-3'. The forward primer  
492 contained a Kozak sequence and both primers contained 15-bp overhang with homology  
493 to the plasmid for InFusion cloning (Takara Bio, 638947). To make pmCherry-N1-Gal3,  
494 Gal3 cDNA was amplified using primers 5'-  
495 CCGGAATTCGCCACCATGGCAGACAATTTTTTCGCTC-3' and 5'-  
496 CGCGGATCCCGTATCATGGTATATGAAGCACTG-3' and subcloned into pmCherry-  
497 N1.

498

#### 499 ***R. parkeri* strains and bacterial isolation**

500 *R. parkeri* Portsmouth strain (WT) was provided by Dr. Christopher Paddock  
501 (Centers for Disease Control and Prevention). The *pat1::Tn* mutant was generated from  
502 this strain as described previously (60). *R. parkeri* strains were purified by infecting  
503 confluent Vero cells in T175 flasks at an MOI of 0.05. Flasks were monitored for plaque  
504 formation and harvested when 70-80% of the cells in the flask were rounded, typically 5-  
505 7 d after infection. Cells were scraped and pelleted at 12,000 x g for 30 min at 4°C. The  
506 pelleted cells were resuspended in ice-cold K36 buffer (0.05 M KH<sub>2</sub>PO<sub>4</sub>, 0.05 M K<sub>2</sub>HPO<sub>4</sub>,  
507 pH 7.0, 100 mM KCl, 15 mM NaCl) and transferred to a Dounce homogenizer. Repeated  
508 douncing of 60-80 strokes released intracellular bacteria and the lysed cells and bacteria  
509 were centrifuged at 200 x g for 5 min at 4°C. The supernatant containing the bacteria was  
510 overlaid on a 30% MD-76R solution (Bracco Diagnostics, NDC 0270-0860-30) and  
511 centrifuged at 18,000 rpm for 30 min at 4°C in a SW-28 rotor to further separate host cell

512 components from bacteria. Bacterial pellets were resuspended in brain heart infusion  
513 (BHI) media (BD Difco, 237500) and stored at -80°C. Purified bacteria are referred to as  
514 “30% preparations” below.

515 For complementation of the *pat1::Tn* mutant, small scale electroporations were  
516 performed with pMW1650-Spec as previously described for pMW1650 (60). Following  
517 electroporation, 200  $\mu$ l of bacteria per well were added to confluent Vero cells in a 6-well  
518 plate. The plate was rocked at 37°C for 30 min in a humidified chamber. An overlay of  
519 Vero media with 5% FBS and 0.5% agarose was added to each well and incubated at  
520 33°C, 5% CO<sub>2</sub> for 24 h. To select for transformants, an overlay of Vero media with 5%  
521 FBS, 0.5% agarose, and 40  $\mu$ M spectinomycin was added to the cells for plaque isolation.  
522 Individual plaques were picked and resuspended in 200  $\mu$ l BHI media. To grow plaque-  
523 isolated bacteria, plaques were added to Vero cells in a T25 flask and rocked at 37°C for  
524 30 min. Spectinomycin was added to 40  $\mu$ M final concentration, and the flasks were  
525 placed at 33°C and monitored for bacterial growth and harvested when 70-80% of the  
526 cells in the flask were rounded, typically 5-7 d after infection. Infected cells were scraped  
527 from the flask and pelleted at 2,000 x g for 5 min at room temperature followed by  
528 resuspension in K36 buffer. Cells were mechanically disrupted by vortexing at ~2,900  
529 rpm (Vortex Genie 2) with 1 mm glass beads for two 30 s pulses with 30 s incubations on  
530 ice after each pulse. Following disruption, host cell debris was pelleted by centrifuging at  
531 200 x g for 5 min at 4°C. The supernatant was transferred to pre-chilled microcentrifuge  
532 tubes and spun at 10,000 x g for 2 min at 4°C to pellet *R. parkeri*. Bacterial pellets were  
533 washed three times with cold 250 mM sucrose, then resuspended in 200  $\mu$ l BHI (50  $\mu$ l

534 was frozen at -80°C). To further expand the bacterial population, 150  $\mu$ l of bead-prepped  
535 bacteria was mixed with 350  $\mu$ l of Vero media and added to Vero cells in a T75 flask,  
536 rocked at 37°C for 30 min, supplemented with Vero media to a final volume of 12 ml, and  
537 incubated at 33°C in 5% CO<sub>2</sub>. After 5-7 d, when 70-80% of the cells in the flask were  
538 rounded, the process of bead disruption and bacteria isolation was repeated, except the  
539 bacteria were resuspended in BHI without any sucrose washes to generate frozen stocks  
540 that were stored at -80°C. Bacterial strains were screened by PCR for the following: (1)  
541 the presence of the original transposon using primers for the rifampicin resistance  
542 cassette (primers 5'- ATGGTAAAAGATTGGATTCTTCTC-3' and 5'-  
543 CCTTAATCTTCAATAACATGT-3'); (2) the presence of second transposon using primers  
544 for spectinomycin resistance cassette (primers 5'-TGATTTGCTGGTTACGGTGAC-3'  
545 and 5'-CGCTATGTTCTCTTGCTTTTG-3'); and (3) the presence of *pat1::Tn* and WT *pat1*  
546 using primers amplifying *pat1* (primers 5'-GTAGATATAAACAACAATAAGATTAGC-3'  
547 and 5'-GAGATAACCTTGATCATCATCTGTATGC-3'). Strains were also screened by  
548 assessing plaque size and Pat1 expression by western blot (procedure described below).  
549 The *pat1::Tn pat1<sup>+</sup>* strain that contained the original transposon, the second transposon,  
550 plaque size similar to WT, and restored Pat1 protein levels was propagated to purify  
551 bacterial 30% preparations as described above.

552 The insertion site of the transposon was mapped as previously described (93).  
553 Briefly, *R. parkeri* genomic DNA was purified from frozen 30% preparations of bacteria  
554 (~10<sup>8</sup> PFU). Bacteria were thawed and centrifuged at 8,000 rpm for 5 min to pellet  
555 bacteria, then genomic DNA was purified using DNeasy Blood and Tissue kit (Qiagen,

556 69504), according to the manufacturer's protocol for Gram-negative bacteria (except that  
557 the proteinase K incubation was done overnight). 1  $\mu$ g of *R. parkeri* genomic DNA was  
558 digested with HindIII (New England Biolabs, R0104T). The reaction was heat-inactivated  
559 and DNA fragments were self-ligated using T4 DNA ligase (New England Biolabs,  
560 M0202T). *E. coli* were transformed with the ligation reaction and plated onto Luria-Bertani  
561 (LB) agar plates with 40  $\mu$ M spectinomycin to select for plasmids containing the  
562 pMW1650-Spec transposon and flanking regions of genomic DNA. Plasmid DNA was  
563 sequenced (primers 5'-ATCTCGCTTTACCTTGGATTCC-3' and 5'-  
564 CTATACGAAGTTGGGCATAC-3') to determine the genomic location of the insertion site.  
565 The insertion site was then confirmed by PCR from genomic DNA using primers that flank  
566 the insertion region (5'-AAAGCGGGAATCCAGTAAATC-3' and 5'-  
567 GGCACAGCAGAAATTACTCTTG-3').

568

### 569 **Plaque assays and growth curves**

570 To determine the titer of purified bacteria, 200  $\mu$ l of bacteria diluted  $10^{-3}$ - $10^{-8}$  in Vero media  
571 were added to Vero cells grown in 6-well plates. Plates were rocked at 37°C for 30 min  
572 then overlaid with 3 ml of Vero media with 5% FBS and 0.7% agarose. For imaging  
573 plaques, neutral red (0.01% final concentration; Sigma, N6264) in Vero media with 2%  
574 FBS and 0.5% agarose was overlaid onto cells 5-7 d post infection. Because of  
575 differences in timing of plaque formation for the WT and *pat1::Tn* mutant strains, plaque  
576 counts for WT and complemented *pat1::Tn* plaques were done at ~5 d post infection, and

577 those for *pat1::Tn* plaques were done at ~7 d post infection. Plaques were counted and  
578 imaged 24 h after addition of neutral red.

579 Growth curves were carried out following infection of HMECs at an MOI of 0.01 in  
580 24-well plates. At each time point, media was aspirated from individual wells, cells were  
581 washed twice with sterile deionized water, 1 ml of sterile deionized water was added, and  
582 cells were lysed by repeated pipetting. Three serial dilutions of the supernatant from lysed  
583 cells in Vero media, totaling 1 ml each, were added in duplicate to confluent Vero cells in  
584 12-well plates. Plates were spun at 300 x g for 5 min at room temperature and incubated  
585 at 33°C overnight. The next day, media was aspirated and 2 ml of Vero media with 5%  
586 FBS and 0.7% agarose was overlaid in each well. Once plaques were visible, an overlay  
587 with neutral red was done as described above. Because of differences in timing of plaque  
588 formation noted above, plaque counts for WT and complemented *pat1::Tn* plaques were  
589 done at ~5 d post infection and those for *pat1::Tn* plaques were done at ~7 d post  
590 infection.

591

## 592 **Pat1 expression and antibody generation**

593 For expression of 6xHis-MBP-TEV-Pat1, *E. coli* strain BL21 codon plus RIL-Cam<sup>r</sup>  
594 (DE3) with plasmid pET-M1-6xHis-MBP-TEV-Pat1 was grown in LB with 25 mM glucose  
595 an OD<sub>600</sub> of 0.5 and expression was induced with 1 mM IPTG for 1 h at 37°C. Bacteria  
596 were pelleted by spinning at 4,000 rpm for 30 min at 4°C, and the pellet was resuspended  
597 in MBP lysis buffer (50 mM Tris-HCl, pH 8.0, 300 mM NaCl, 1 mM EDTA) supplemented  
598 with 1 µg/ml each leupeptin (MilliporeSigma, L2884), pepstatin (MilliporeSigma, P5318),



599 and chymostatin (MilliporeSigma, E16), and 1 mM phenylmethylsulfonyl fluoride (PMSF,  
600 MilliporeSigma, 52332). Bacteria were flash frozen in liquid nitrogen and stored at -80°C.  
601 Bacterial cultures were thawed quickly and kept on ice or at 4°C for the remaining steps.  
602 Lysozyme (Sigma, L4919) was added to a final concentration of 1 mg/ml followed by a  
603 15 min incubation on ice. Bacteria were subjected to 8 cycles of sonication at 30% power  
604 for 12 s bursts, followed by rest on ice for 30 s. Lysed bacteria were spun at 13,000 rpm  
605 for 30 min at 4°C. The supernatant was passed three times over a column of 10 ml of  
606 amylose resin (New England Biolabs, E8031L). The column was washed with MBP wash  
607 buffer (50 mM Tris-HCl, pH 8.0, 300 mM NaCl) by passing 15 column volumes. Bound  
608 protein was eluted by adding 2-3 column volumes of MBP elution buffer (50 mM Tris-HCl,  
609 pH 8.0, 300 mM NaCl, 0.5 mM DTT, 10 mM maltose) to the column and collecting 500  $\mu$ l  
610 fractions. Fractions were checked for eluted protein by both Bradford assay and SDS-  
611 PAGE, and fractions with the highest concentration of protein and a single band at the  
612 expected molecular weight for MBP-Pat1 were pooled and concentrated.

613 To generate rabbit anti-Pat1 antibodies, 1.7 mg of purified MBP-Pat1 was sent to  
614 Pocono Rabbit Farm and Laboratory. Immunization was carried out following their 91-day  
615 custom antibody production protocol, then extended for an additional 6 weeks for an  
616 additional boost and bleed before final exsanguination.

617 To affinity purify anti-Pat1 antibodies, *E. coli* strain BL21 codon plus RIL-Cam<sup>r</sup>  
618 (DE3) with plasmid pSMT3-6x-His-SUMO-Pat1 was grown, induced for protein  
619 expression, and isolated as described above. Bacterial pellets were resuspended in His  
620 lysis buffer (20 mM Tris-HCl, pH 8.0, 300 mM NaCl, 10 mM imidazole) supplemented with

621 protease inhibitors PMSF and LPC at the same concentrations as described above.  
622 Bacteria were lysed by sonication and the lysate centrifuged as described above. The  
623 supernatant was incubated with 2.0 ml of Ni-NTA resin (Qiagen, 30210) for 1 h at 4°C  
624 with rotation and the resin was applied to a column. The column was washed with His  
625 wash buffer (20 mM Tris-HCL, pH 8.0, 300 mM NaCl, 30 mM imidazole), and protein was  
626 eluted from the column in 500  $\mu$ l aliquots with 2 column volumes of His elution buffer (50  
627 mM NaH<sub>2</sub>PO<sub>4</sub>, pH 8.0, 300 mM NaCl, 250 mM imidazole). The same protocol was  
628 followed to purify 6x-His-SUMO from *E. coli* strain BL21 codon plus RIL-Cam<sup>r</sup> (DE3)  
629 transformed with the parental plasmid pSMT3. Purified 6x-His-SUMO or 6x-His-SUMO-  
630 Pat1 were coupled to NHS-activated Sepharose 4 fast flow resin (GE Healthcare, 17-  
631 0906-01) in ligand coupling buffer (200 mM NaHCO<sub>3</sub>, pH 8.3, 500 mM NaCl) for 2-4 h at  
632 room temperature. To remove anti-SUMO antibodies, the 6x-His-Sumo resin was  
633 incubated with 10 ml anti-Pat1 serum diluted in binding buffer (20mM Tris-HCl, pH 7.5)  
634 and incubated at 4°C for 2 h with rotation. The flow through was collected and added to  
635 the 6x-His-SUMO-Pat1 resin and was incubated at 4°C for 4 h with rotation. Bound  
636 antibody was eluted with 100 mM glycine, pH 2.5, into tubes containing 120  $\mu$ l 1M Tris-  
637 HCl, pH 8.8, to neutralize to pH 7.5. Eluted fractions were dialyzed in phosphate-buffered  
638 saline (PBS; 137 mM NaCl, 2.7 mM KCl, 10mM Na<sub>2</sub>PO<sub>4</sub>, 1.8 mM KH<sub>2</sub>PO<sub>4</sub>, pH 7.4) with  
639 50% glycerol (pH 8.0) overnight at 4°C, concentrated and stored at -20°C.

640

## 641 **Western blotting**

642 For detection of Pat1 in bacterial cell lysates, 30% purified bacteria were boiled in  
643 1x SDS loading buffer (150 mM Tris pH 6.8, 6% SDS, 0.3% bromophenol blue, 30%  
644 glycerol, 15%  $\beta$ -mercaptoethanol) for 10 min, resolved on a 10% SDS-PAGE gel, then  
645 transferred to a PVDF membrane (Millipore, IPFL00010). The membrane was blocked  
646 overnight at 4°C in TBS-T (20 mM Tris, 150 mM NaCl, pH 8.0, 0.1% Tween 20 (Sigma,  
647 P9416) plus 5% dry milk (Apex, 20-241). Affinity purified anti-Pat1 antibody was diluted  
648 1:1,000 in TBS-T plus 5% dry milk and incubated with the membrane overnight at 4°C.  
649 Anti-RickA (98) was used as a loading control by diluting serum 1:2,000 in TBS-T plus  
650 5% dry milk and incubating at room temperature for 1 h. Membranes were washed with  
651 TBS-T for 5 x 5 min intervals at room temperature. Secondary antibody goat anti-rabbit  
652 HRP (Santa Cruz Biotechnology, sc-2004) was diluted 1:3,000 in TBS-T plus 5% dry milk  
653 and incubated at RT for 30 min, followed by 5 x 5 min washes with TBS-T. To detect  
654 secondary antibodies, ECL HRP substrate kit (Advansta, K-12045) was added to the  
655 membrane for 45 s at room temperature and developed using Biomac Light film  
656 (Carestream, 178-8207).

657

### 658 **Bacterial infections for imaging**

659 Infections were carried out in 24-well plates unless otherwise noted. For  
660 immunofluorescence microscopy, 24-well plates containing 12 mm sterile coverslips were  
661 used. HMECs were seeded at  $2.5 \times 10^5$  cells/well and infected 36-48 h later. A549 cells  
662 were seeded at  $1.2 \times 10^5$  cells/well and infected 24 h later. For timepoints from 0-2 hpi, an  
663 MOI of 3-5 was used for all cell types, and for 24-48 hpi, an MOI of 0.01-0.05 was used.

664 For the infectious focus assay, an MOI of 0.001 was used. To infect cells, a 30%  
665 preparation of *R. parkeri* was thawed on ice prior to infection and immediately diluted into  
666 fresh media on ice. Cell media was aspirated, the well was washed once with PBS (Gibco,  
667 10010049), 0.5 ml of bacteria in media was added per well, and the plate was spun at  
668 300 x g for 5 min at room temperature. Media at 33°C was added following centrifugation  
669 and infected cells were incubated at 33°C in 5% CO<sub>2</sub>.

670 For Gal3 and Gal8 imaging experiments, HMECs were transfected with pmCherry-  
671 N1-Gal3 or pmCherry-N1-Gal8 using Lipofectamine LTX (Invitrogen, A12621) and  
672 incubated at 37°C overnight. The next morning, wells were washed twice with PBS and  
673 replaced with fresh, warm HMEC media. Cells were visually examined to confirm 80-  
674 100% confluency and the presence of Gal3 or Gal8 expression. Infections were  
675 performed a few hours later.

676 The mixed cell assay was adapted from a prior study (67). Briefly, A549-TRTF cells  
677 and unlabeled A549 cells were seeded into 12-well plates at a density of 3x10<sup>5</sup> cells/ml  
678 and grown overnight. The following day, A549-TRTF cells were infected at an MOI of 5  
679 as described above and incubated at 33°C for 1 h. Both infected A549-TRTF cells and  
680 unlabeled A549 cells were detached by adding warm citric saline (135 mM KCl, 15 mM  
681 sodium citrate) and incubating for 5 min at 37°C. Cells were gently resuspended by  
682 pipetting up and down and recovered in A549 media, then washed twice with A549 media.  
683 Cells were resuspended in A549 media with 10 µg/ml gentamycin to kill extracellular  
684 bacteria. Infected A549-TRTF and unlabeled cells were mixed at a ratio of 1:120, plated

685 on coverslips in a 24-well plate, and incubated in a humidified secondary container at  
686 33°C until 32 hpi.

687 Hypotonic shock treatment was adapted from a prior study (65). Briefly, HMECs  
688 were infected as stated above and incubated for 5 min at 37°C, at which point media was  
689 exchanged with a hypertonic solution (10% PEG-1000, 0.5 M sucrose in PBS) and  
690 incubated at 37°C for 10 min. Wells were washed gently once with the hypotonic solution  
691 (60% PBS), incubated in hypotonic solution at 37°C for 3 min, then incubated in isotonic  
692 HMEC media for 15 min at 37°C.

693

#### 694 **Immunofluorescence microscopy**

695 All coverslips were fixed for 10 min in fresh 4% paraformaldehyde (Ted Pella,  
696 18505) at room temperature. Coverslips were washed 3x with PBS pH 7.4 and stored at  
697 4°C until staining. All antibodies were diluted in PBS with 2% BSA (Sigma, A9418). All  
698 incubations were done at room temperature unless otherwise noted and all coverslips  
699 were mounted in Prolong Gold antifade (Invitrogen, P36930) and sealed with nail polish  
700 after drying.

701 Primary antibodies used to stain *Rickettsia* were rabbit anti-*Rickettsia* I7205  
702 (1:300; (99)); gift from T. Hackstadt), rabbit anti-*Rickettsia* OmpB (1:1,000; (82)), and  
703 mouse anti-*Rickettsia* 14-13 (1:400; (99)); gift from T. Hackstadt). Primary antibodies  
704 were incubated with coverslips for 30 min. Coverslips were washed 3x with PBS and the  
705 following secondary antibodies were added for 30 min, protected from light: goat anti-  
706 rabbit Alexa 488 (1:400; Invitrogen, A11008), goat anti-rabbit Alexa 404 (1:150;

707 Invitrogen, A31556), goat anti-mouse Alexa 488 (1:400; Invitrogen, A11001), and goat  
708 anti-mouse Alexa 404 (1:150; Invitrogen, A31553).

709 To quantify colocalization with polyubiquitin and autophagy adapters, cells were  
710 permeabilized with 0.5% Triton-X100 and washed three times with PBS. Primary  
711 antibodies were added for 30 min to 1 h at the following dilutions: mouse anti-polyubiquitin  
712 FK1 (1:250; EMD Millipore, 04-262), guinea pig anti-p62 (1:500; Fitzgerald, 20R-PP001),  
713 mouse anti-NDP52 (1:300; Novus Biologicals, H00010241-B01P). For staining with rabbit  
714 polyclonal anti-LC3 (1:250; Novus Biologicals, NB100-2220SS) and mouse anti-human  
715 Lamp1 (1:25; BD Bioscience, 555801), cells were post-fixed in 100% methanol at room  
716 temperature for 5 min. After antibody incubations, coverslips were washed 3x with PBS  
717 and the following secondary antibodies were added for 30 min and protected from the  
718 light: goat anti-mouse Alexa 568 (1:500; Invitrogen, A11004), goat anti-mouse Alexa 488  
719 (1:400; Invitrogen, A11001), anti-guinea pig Alexa 568 (1:500; Invitrogen, A11075), and  
720 anti-guinea pig Alexa 488 (1:400; Invitrogen, A11073). Coverslips were then washed  
721 three times with PBS.

722 To quantify the percent of bacteria with actin tails, cells were permeabilized with  
723 0.5% Triton-X100 for 5 min then washed three times with PBS. *Rickettsia* were stained  
724 with either anti-*Rickettsia* 14-13 or anti-*Rickettsia* I7205 as described above. After  
725 staining for *Rickettsia*, actin was stained with phalloidin-568 (diluted 1:500 in PBS with  
726 2% BSA; Life Technologies, A12380) for 30 min at room temperature. Coverslips were  
727 then washed three times with PBS.

728 To quantify the percent of bacteria with actin tails in the mixed cell assay, cells  
729 were permeabilized with 0.1% Triton-X100 for 5 min then washed three times with PBS.  
730 *Rickettsia* was detected with the primary antibody mouse anti-*Rickettsia* 14-13 and the  
731 secondary antibody goat anti-mouse Alexa 404 as described above. After staining for  
732 *Rickettsia*, actin was stained with phalloidin-488 (diluted 1:400 in PBS with 2% BSA; Life  
733 Technologies, P3457) for 30 min at room temperature. Coverslips were then washed  
734 three times with PBS.

735 To quantify the size of infectious foci (64, 67), cells were permeabilized with 0.05%  
736 Triton-X100 for 5 min, washed three times with PBS, and blocked with PBS containing  
737 2% BSA for 1 h. Coverslips were incubated with anti- $\beta$ -catenin (1:200; BD Bioscience,  
738 610153) for 1 h at room temperature, then washed three times with PBS, followed by  
739 incubation with goat anti-mouse Alexa-568 (1:500; Invitrogen, A11004) for 30 min  
740 protected from the light. Cells were subsequently stained to detect *Rickettsia* with anti-  
741 I7205 for 30 min and goat anti-rabbit Alexa 488 as described above. Nuclei were stained  
742 with Hoechst (1:10,000; Thermo Scientific, 62249) for 15 min. To quantify, the number of  
743 infected cells per focus was counted for 10-15 foci per experiment.

744

#### 745 **Transmission electron microscopy**

746 HMEC-1 cells were seeded into 6-well plates ( $1 \times 10^6$  cells per well) and grown for  
747 36 h. Media was aspirated and 2.5 ml of bacteria in media at an MOI of 5 were added.  
748 The plates were spun at 300 x g for 5 min at room temperature, then 2.5 ml of warm  
749 HMEC-1 media was added to each well, and the plates were placed at 33°C. Time points

750 were taken by aspirating media, washing the well with PBS, and fixing the cells in fixative  
751 (2% paraformaldehyde, 2% glutaraldehyde in 0.05M cacodylate buffer, pH 7.2) for 45 min  
752 at room temperature. Cells were scraped and pelleted in microcentrifuge tubes and stored  
753 in fresh fixative at 4°C until embedding. Samples were embedded in 2% low melt agarose  
754 and placed in 2% glutaraldehyde in 1M cacodylate buffer, pH 7.2, and stored at 4°C  
755 overnight. The next day, samples were post-fixed with 1% osmium tetroxide and 1.6%  
756 potassium ferricyanide, then dehydrated in increasing concentrations of ice-cold ethanol  
757 (70%-100%). Samples were embedded in Epon 812 resin (11.75g Epon 12, 6.25g  
758 dodecyl succinic anhydride, 7g nadic methyl anhydride, and 0.375 ml of the accelerator  
759 benzyldimethylamine was added during the dehydration step) and stained with 2% uranyl  
760 acetate and lead citrate. Images were captured with a FEI Tecani 12 transmission  
761 electron microscope and analyzed manually to determine the total number of intracellular  
762 bacteria and their respective localizations within the cell.

763

## 764 **Mouse Studies**

765 Animal research was conducted under a protocol approved by the University of  
766 California, Berkeley Institutional Animal Care and Use Committee (IACUC) in compliance  
767 with the Animal Welfare Act and other federal statutes relating to animals and  
768 experiments using animals (Welch lab animal use protocol AUP-2016-02-8426-1). Mice  
769 were 8-20 weeks old at the time of initial infection. Mice were selected for experiments  
770 based on their availability, regardless of sex, and both sexes were used for each  
771 experimental group. All mice were of the C57BL/6J background were double knock outs



772 for the genes encoding the receptors for IFN-I (*Ifnar1*) and IFN- $\gamma$  (*Ifngr1*) (*Ifnar1*<sup>-/-</sup>;*Ifngr1*<sup>-/-</sup>)  
773 <sup>-/-</sup>) (Jackson Labs stock #:029098, described in (61)) and were healthy at the time of  
774 infection. *R. parkeri* was prepared by diluting 30% preparation bacteria into 1 ml cold  
775 sterile PBS on ice, centrifuging the bacteria at 12,000 x *g* for 1 min, and resuspending in  
776 cold sterile PBS to the desired concentration ( $5 \times 10^6$  PFU/ml for intravenous infection).  
777 The bacterial suspensions were kept on ice during injections. Mice were exposed to a  
778 heat lamp while in their cages for approximately 5 min and then each mouse was moved  
779 to a mouse restrainer (Braintree, TB-150 STD). The tail was sterilized with 70% ethanol,  
780 and 200  $\mu$ l bacterial suspensions were injected using 30.5-gauge needles into the lateral  
781 tail vein. Body temperatures were monitored using a rodent rectal thermometer  
782 (BrainTree Scientific, RET-3). Mice were euthanized if their body temperature fell below  
783 90°F (32.2°C) or if they exhibited severe lethargy that prevented their normal movement  
784 around the cage.

785

## 786 **Statistics**

787 The statistical parameters and significance are reported in the figure legends. Data  
788 were considered to be statistically significant when  $P < 0.05$ , as determined by an  
789 unpaired Student's *t*-test, a one-way ANOVA with either multiple comparisons or  
790 comparison to WT bacteria, a two-way ANOVA, or a log-rank (Mantel-Cox) test. Asterisks  
791 denote statistical significance as: \* $P < 0.05$ ; \*\* $P < 0.01$ ; \*\*\* $P < 0.001$ ; \*\*\*\* $P < 0.0001$ ,  
792 compared with the indicated controls. Statistical analyses were performed using  
793 GraphPad PRISM v.9.

794

795

796 **Acknowledgements**

797 We thank Ted Hackstadt, David Wood, and Christopher Paddock for kindly providing  
798 strains and reagents. We thank previous Welch Lab members whose work supported this  
799 project, including Rebecca Lamason, Natasha Kafai, Julie Choe, and Shawna Reed, and  
800 current lab members for critical feedback throughout the development of this project. We  
801 also thank the following UC Berkeley core facilities and their facility members for providing  
802 equipment, reagents, and technical support to complete this work: Danielle Jorgens,  
803 Reena Zalpuri, and Guangwei Min (UC Berkeley Electron Microscope Laboratory); Holly  
804 Aaron and Feather Ives (CRL Molecular Imaging Center); and Alison Killilea (Cell Culture  
805 Facility). We thank David Drubin, Karsten Gronert, and Daniel Portnoy for technical  
806 discussion and critical guidance for this work. We also thank Neil Fischer for proofreading  
807 the manuscript. This work was funded by grant R01 AI109044 from the NIH/NIAID to  
808 M.D.W.

809

810

811 **References**

- 812 1. Parola P, Paddock CD, Socolovschi C, Labruna MB, Mediannikov O, Kernif T,  
813 Abdad MY, Stenos J, Bitam I, Fournier P-E, Raoult D. 2013. Update on tick-borne  
814 rickettsioses around the world: a geographic approach. *Clin Microbiol Rev* 26:657–  
815 702.

- 816 2. Blanton LS. 2019. The Rickettsioses: A Practical Update. *Infect Dis Clin North Am*  
817 33:213–229.
- 818 3. Jay R, Armstrong PA. 2020. Clinical characteristics of Rocky Mountain spotted  
819 fever in the United States: A literature review. *J Vector Borne Dis* 57:114–120.
- 820 4. Herrick KL, Pena SA, Yaglom HD, Layton BJ, Moors A, Loftis AD, Condit ME,  
821 Singleton J, Kato CY, Denison AM, Ng D, Mertins JW, Paddock CD. 2016.  
822 *Rickettsia parkeri* Rickettsiosis, Arizona, USA. *Emerg Infect Dis* 22:780–785.
- 823 5. Paddock CD, Finley RW, Wright CS, Robinson HN, Schrodt BJ, Lane CC, Ekenna  
824 O, Blass MA, Tamminga CL, Ohl CA, McLellan SLF, Goddard J, Holman RC,  
825 Openshaw JJ, Sumner JW, Zaki SR, Ereemeeva ME. 2008. *Rickettsia parkeri*  
826 rickettsiosis and its clinical distinction from Rocky Mountain spotted fever. *Clin*  
827 *Infect Dis* 47:1188–1196.
- 828 6. Grasperge BJ, Reif KE, Morgan TD, Sunyakumthorn P, Bynog J, Paddock CD,  
829 Macaluso KR. 2012. Susceptibility of inbred mice to *Rickettsia parkeri*. *Infect*  
830 *Immun* 80:1846–1852.
- 831 7. Saito TB, Bechelli J, Smalley C, Karim S, Walker DH. 2019. Vector Tick  
832 Transmission Model of Spotted Fever Rickettsiosis. *Am J Pathol* 189:115–123.
- 833 8. Burke TP, Engström P, Tran CJ, Langohr IM, Glasner DR, Espinosa DA, Harris E,  
834 Welch MD. 2021. Interferon receptor-deficient mice are susceptible to eschar-  
835 associated rickettsiosis. *Elife* 10:e67029.

- 836 9. Londoño AF, Mendell NL, Walker DH, Bouyer DH. 2019. A biosafety level-2 dose-  
837 dependent lethal mouse model of spotted fever rickettsiosis: *Rickettsia parkeri*  
838 Atlantic Rainforest strain. *PLoS Negl Trop Dis* 13:e0007054.
- 839 10. Narra HP, Sahni A, Walker DH, Sahni SK. 2020. Recent research milestones in the  
840 pathogenesis of human rickettsioses and opportunities ahead. *Future Microbiol*  
841 15:753–765.
- 842 11. Voss OH, Rahman MS. 2021. *Rickettsia*-host interaction: strategies of  
843 intracytosolic host colonization. *Pathog Dis* 79(4):ftab015.
- 844 12. Lamason RL, Welch MD. 2017. Actin-based motility and cell-to-cell spread of  
845 bacterial pathogens. *Curr Opin Microbiol* 35:48–57.
- 846 13. Bajunaid W, Haidar-Ahmad N, Kottarampatel AH, Ourida Manigat F, Silué N,  
847 Tchagang CF, Tomaro K, Campbell-Valois F-X. 2020. The T3SS of *Shigella*:  
848 Expression, Structure, Function, and Role in Vacuole Escape. *Microorganisms*  
849 8(12):1933
- 850 14. Du J, Reeves AZ, Klein JA, Twedt DJ, Knodler LA, Lesser CF. 2016. The type III  
851 secretion system apparatus determines the intracellular niche of bacterial  
852 pathogens. *Proc Natl Acad Sci U S A* 113:4794–4799.
- 853 15. High N, Mounier J, Prévost MC, Sansonetti PJ. 1992. IpaB of *Shigella flexneri*  
854 causes entry into epithelial cells and escape from the phagocytic vacuole. *EMBO J*  
855 11:1991–1999.

- 856 16. Page AL, Ohayon H, Sansonetti PJ, Parsot C. 1999. The secreted IpaB and IpaC  
857 invasins and their cytoplasmic chaperone IpgC are required for intercellular  
858 dissemination of *Shigella flexneri*. *Cell Microbiol* 1:183–193.
- 859 17. Picking WL, Nishioka H, Hearn PD, Baxter MA, Harrington AT, Blocker A, Picking  
860 WD. 2005. IpaD of *Shigella flexneri* is independently required for regulation of Ipa  
861 protein secretion and efficient insertion of IpaB and IpaC into host membranes.  
862 *Infect Immun* 73:1432–1440.
- 863 18. Schuch R, Sandlin RC, Maurelli AT. 1999. A system for identifying post-invasion  
864 functions of invasion genes: requirements for the Mxi-Spa type III secretion  
865 pathway of *Shigella flexneri* in intercellular dissemination. *Mol Microbiol* 34:675–  
866 689.
- 867 19. Alberti-Segui C, Goeden KR, Higgins DE. 2007. Differential function of *Listeria*  
868 *monocytogenes* listeriolysin O and phospholipases C in vacuolar dissolution  
869 following cell-to-cell spread. *Cell Microbiol* 9:179–195.
- 870 20. Beauregard KE, Lee KD, Collier RJ, Swanson JA. 1997. pH-dependent perforation  
871 of macrophage phagosomes by listeriolysin O from *Listeria monocytogenes*. *J Exp*  
872 *Med* 186:1159–1163.
- 873 21. Portnoy DA, Jacks PS, Hinrichs DJ. 1988. Role of hemolysin for the intracellular  
874 growth of *Listeria monocytogenes*. *J Exp Med* 167:1459–1471.

- 875 22. Schnupf P, Portnoy DA. 2007. Listeriolysin O: a phagosome-specific lysin.  
876 *Microbes Infect* 9:1176–1187.
- 877 23. Burrack LS, Harper JW, Higgins DE. 2009. Perturbation of vacuolar maturation  
878 promotes listeriolysin O-independent vacuolar escape during *Listeria*  
879 *monocytogenes* infection of human cells. *Cell Microbiol* 11:1382–1398.
- 880 24. Camilli A, Tilney LG, Portnoy DA. 1993. Dual roles of *plcA* in *Listeria*  
881 *monocytogenes* pathogenesis. *Mol Microbiol* 8:143–157.
- 882 25. Gründling A, Gonzalez MD, Higgins DE. 2003. Requirement of the *Listeria*  
883 *monocytogenes* broad-range phospholipase PC-PLC during infection of human  
884 epithelial cells. *J Bacteriol* 185:6295–6307.
- 885 26. Marquis H, Doshi V, Portnoy DA. 1995. The broad-range phospholipase C and a  
886 metalloprotease mediate listeriolysin O-independent escape of *Listeria*  
887 *monocytogenes* from a primary vacuole in human epithelial cells. *Infect Immun*  
888 63:4531–4534.
- 889 27. Smith GA, Marquis H, Jones S, Johnston NC, Portnoy DA, Goldfine H. 1995. The  
890 two distinct phospholipases C of *Listeria monocytogenes* have overlapping roles in  
891 escape from a vacuole and cell-to-cell spread. *Infect Immun* 63:4231–4237.
- 892 28. Rahman MS, Ammerman NC, Sears KT, Ceraul SM, Azad AF. 2010. Functional  
893 characterization of a phospholipase A(2) homolog from *Rickettsia typhi*. *J Bacteriol*  
894 192:3294–3303.

- 895 29. Renesto P, Dehoux P, Gouin E, Touqui L, Cossart P, Raoult D. 2003. Identification  
896 and characterization of a phospholipase D-superfamily gene in rickettsiae. *J Infect*  
897 *Dis* 188:1276–1283.
- 898 30. Driskell LO, Yu X, Zhang L, Liu Y, Popov VL, Walker DH, Tucker AM, Wood DO.  
899 2009. Directed mutagenesis of the *Rickettsia prowazekii* pld gene encoding  
900 phospholipase D. *Infect Immun* 77:3244–3248.
- 901 31. Whitworth T, Popov VL, Yu X-J, Walker DH, Bouyer DH. 2005. Expression of the  
902 *Rickettsia prowazekii* pld or tlyC gene in *Salmonella enterica* serovar Typhimurium  
903 mediates phagosomal escape. *Infect Immun* 73:6668–6673.
- 904 32. Winkler HH, Daugherty RM. 1989. Phospholipase A activity associated with the  
905 growth of *Rickettsia prowazekii* in L929 cells. *Infect Immun* 57:36–40.
- 906 33. Winkler HH, Miller ET. 1982. Phospholipase A and the interaction of *Rickettsia*  
907 *prowazekii* and mouse fibroblasts (L-929 cells). *Infect Immun* 38:109–113.
- 908 34. Walker DH, Firth WT, Ballard JG, Hegarty BC. 1983. Role of phospholipase-  
909 associated penetration mechanism in cell injury by *Rickettsia rickettsii*. *Infect*  
910 *Immun* 40:840–842.
- 911 35. Walker DH, Feng HM, Popov VL. 2001. Rickettsial phospholipase A2 as a  
912 pathogenic mechanism in a model of cell injury by typhus and spotted fever group  
913 rickettsiae. *Am J Trop Med Hyg* 65:936–942.

- 914 36. Silverman DJ, Santucci LA, Meyers N, Sekeyova Z. 1992. Penetration of host cells  
915 by *Rickettsia rickettsii* appears to be mediated by a phospholipase of rickettsial  
916 origin. *Infect Immun* 60:2733–2740.
- 917 37. Rahman MS, Gillespie JJ, Kaur SJ, Sears KT, Ceraul SM, Beier-Sexton M, Azad  
918 AF. 2013. *Rickettsia typhi* possesses phospholipase A2 enzymes that are involved  
919 in infection of host cells. *PLoS Pathog* 9:e1003399.
- 920 38. Huang J, Brumell JH. 2014. Bacteria-autophagy interplay: a battle for survival. *Nat*  
921 *Rev Microbiol* 12:101–114.
- 922 39. Kirkin V, McEwan DG, Novak I, Dikic I. 2009. A role for ubiquitin in selective  
923 autophagy. *Mol Cell* 34:259–269.
- 924 40. Perrin AJ, Jiang X, Birmingham CL, So NSY, Brumell JH. 2004. Recognition of  
925 bacteria in the cytosol of Mammalian cells by the ubiquitin system. *Curr Biol*  
926 14:806–811.
- 927 41. Johansen T, Lamark T. 2011. Selective autophagy mediated by autophagic adapter  
928 proteins. *Autophagy* 7:279–296.
- 929 42. Mostowy S, Sancho-Shimizu V, Hamon MA, Simeone R, Brosch R, Johansen T,  
930 Cossart P. 2011. p62 and NDP52 proteins target intracytosolic *Shigella* and *Listeria*  
931 to different autophagy pathways. *J Biol Chem* 286:26987–26995.
- 932 43. Pankiv S, Clausen TH, Lamark T, Brech A, Bruun J-A, Outzen H, Øvervatn A,  
933 Bjørkøy G, Johansen T. 2007. p62/SQSTM1 binds directly to Atg8/LC3 to facilitate



- 934 degradation of ubiquitinated protein aggregates by autophagy. *J Biol Chem*  
935 282:24131–24145.
- 936 44. Zheng YT, Shahnazari S, Brech A, Lamark T, Johansen T, Brumell JH. 2009. The  
937 adaptor protein p62/SQSTM1 targets invading bacteria to the autophagy pathway.  
938 *J Immunol* 183:5909–5916.
- 939 45. Thurston TLM, Ryzhakov G, Bloor S, von Muhlinen N, Randow F. 2009. The TBK1  
940 adaptor and autophagy receptor NDP52 restricts the proliferation of ubiquitin-  
941 coated bacteria. *Nat Immunol* 10:1215–1221.
- 942 46. von Muhlinen N, Thurston T, Ryzhakov G, Bloor S, Randow F. 2010. NDP52, a  
943 novel autophagy receptor for ubiquitin-decorated cytosolic bacteria. *Autophagy*  
944 6:288–289.
- 945 47. Kabeya Y, Mizushima N, Ueno T, Yamamoto A, Kirisako T, Noda T, Kominami E,  
946 Ohsumi Y, Yoshimori T. 2000. LC3, a mammalian homologue of yeast Apg8p, is  
947 localized in autophagosome membranes after processing. *EMBO J* 19:5720–5728.
- 948 48. Tanida I, Ueno T, Kominami E. 2004. LC3 conjugation system in mammalian  
949 autophagy. *Int J Biochem Cell Biol* 36:2503–2518.
- 950 49. Mitchell G, Ge L, Huang Q, Chen C, Kianian S, Roberts MF, Schekman R, Portnoy  
951 DA. 2015. Avoidance of autophagy mediated by PlcA or ActA is required for  
952 *Listeria monocytogenes* growth in macrophages. *Infect Immun* 83:2175–2184.

- 953 50. Tattoli I, Sorbara MT, Yang C, Tooze SA, Philpott DJ, Girardin SE. 2013. *Listeria*  
954 phospholipases subvert host autophagic defenses by stalling pre-autophagosomal  
955 structures. *EMBO J* 32:3066–3078.
- 956 51. Hong M-H, Weng I-C, Li F-Y, Lin W-H, Liu F-T. 2021. Intracellular galectins sense  
957 cytosolically exposed glycans as danger and mediate cellular responses. *J Biomed*  
958 *Sci* 28:16.
- 959 52. Paz I, Sachse M, Dupont N, Mounier J, Cederfur C, Enninga J, Leffler H, Poirier F,  
960 Prevost M-C, Lafont F, Sansonetti P. 2010. Galectin-3, a marker for vacuole lysis  
961 by invasive pathogens. *Cell Microbiol* 12:530–544.
- 962 53. Weng I-C, Chen H-L, Lo T-H, Lin W-H, Chen H-Y, Hsu DK, Liu F-T. 2018. Cytosolic  
963 galectin-3 and -8 regulate antibacterial autophagy through differential recognition of  
964 host glycans on damaged phagosomes. *Glycobiology* 28:392–405.
- 965 54. Dupont N, Lacas-Gervais S, Bertout J, Paz I, Freche B, Van Nhieu GT, van der  
966 Goot FG, Sansonetti PJ, Lafont F. 2009. *Shigella* phagocytic vacuolar membrane  
967 remnants participate in the cellular response to pathogen invasion and are  
968 regulated by autophagy. *Cell Host Microbe* 6:137–149.
- 969 55. Thurston TLM, Wandel MP, von Muhlinen N, Foeglein A, Randow F. 2012. Galectin  
970 8 targets damaged vesicles for autophagy to defend cells against bacterial  
971 invasion. *Nature* 482:414–418.

- 972 56. Feeley EM, Pilla-Moffett DM, Zwack EE, Piro AS, Finethy R, Kolb JP, Martinez J,  
973 Brodsky IE, Coers J. 2017. Galectin-3 directs antimicrobial guanylate binding  
974 proteins to vacuoles furnished with bacterial secretion systems. *Proc Natl Acad Sci*  
975 *U S A* 114:E1698–E1706.
- 976 57. Mansilla Pareja ME, Bongiovanni A, Lafont F, Colombo MI. 2017. Alterations of the  
977 *Coxiella burnetii* Replicative Vacuole Membrane Integrity and Interplay with the  
978 Autophagy Pathway. *Front Cell Infect Microbiol* 7:112.
- 979 58. Bell SL, Lopez KL, Cox JS, Patrick KL, Watson RO. 2021. Galectin-8 Senses  
980 Phagosomal Damage and Recruits Selective Autophagy Adapter TAX1BP1 To  
981 Control *Mycobacterium tuberculosis* Infection in Macrophages. *mBio* e0187120.
- 982 59. Fujita N, Morita E, Itoh T, Tanaka A, Nakaoka M, Osada Y, Umemoto T, Saitoh T,  
983 Nakatogawa H, Kobayashi S, Haraguchi T, Guan J-L, Iwai K, Tokunaga F, Saito K,  
984 Ishibashi K, Akira S, Fukuda M, Noda T, Yoshimori T. 2013. Recruitment of the  
985 autophagic machinery to endosomes during infection is mediated by ubiquitin. *J*  
986 *Cell Biol* 203:115–128.
- 987 60. Lamason RL, Kafai NM, Welch MD. 2018. A streamlined method for transposon  
988 mutagenesis of *Rickettsia parkeri* yields numerous mutations that impact infection.  
989 *PLoS One* 13:e0197012.

- 990 61. Burke TP, Engström P, Chavez RA, Fonbuena JA, Vance RE, Welch MD. 2020.  
991 Inflammasome-mediated antagonism of type I interferon enhances *Rickettsia*  
992 pathogenesis. *Nat Microbiol* 5:688–696.
- 993 62. Teysseire N, Boudier JA, Raoult D. 1995. *Rickettsia conorii* entry into Vero cells.  
994 *Infect Immun* 63:366–374.
- 995 63. Harris EK, Jirakanwisal K, Verhoeve VI, Fongsaran C, Suwanbongkot C, Welch  
996 MD, Macaluso KR. 2018. Role of Sca2 and RickA in the Dissemination of  
997 *Rickettsia parkeri* in *Amblyomma maculatum*. *Infect Immun* 86(6):e00123-18.
- 998 64. Reed SCO, Lamason RL, Risca VI, Abernathy E, Welch MD. 2014. *Rickettsia*  
999 actin-based motility occurs in distinct phases mediated by different actin  
1000 nucleators. *Curr Biol* 24:98–103.
- 1001 65. Okada CY, Rechsteiner M. 1982. Introduction of macromolecules into cultured  
1002 mammalian cells by osmotic lysis of pinocytotic vesicles. *Cell* 29:33–41.
- 1003 66. Smith J, Manoranjan J, Pan M, Bohsali A, Xu J, Liu J, McDonald KL, Szyk A,  
1004 LaRonde-LeBlanc N, Gao L-Y. 2008. Evidence for pore formation in host cell  
1005 membranes by ESX-1-secreted ESAT-6 and its role in *Mycobacterium marinum*  
1006 escape from the vacuole. *Infect Immun* 76:5478–5487.
- 1007 67. Lamason RL, Bastounis E, Kafai NM, Serrano R, Del Álamo JC, Theriot JA, Welch  
1008 MD. 2016. *Rickettsia Sca4* Reduces Vinculin-Mediated Intercellular Tension to  
1009 Promote Spread. *Cell* 167:670-683.e10.

- 1010 68. Kleba B, Clark TR, Lutter EI, Ellison DW, Hackstadt T. 2010. Disruption of the  
1011 *Rickettsia rickettsii* Sca2 autotransporter inhibits actin-based motility. *Infect Immun*  
1012 78:2240–2247.
- 1013 69. Flores-Díaz M, Monturiol-Gross L, Naylor C, Alape-Girón A, Flieger A. 2016.  
1014 Bacterial Sphingomyelinases and Phospholipases as Virulence Factors. *Microbiol*  
1015 *Mol Biol Rev* 80:597–628.
- 1016 70. Flores-Díaz M, Alape-Girón A. 2003. Role of *Clostridium perfringens* phospholipase  
1017 C in the pathogenesis of gas gangrene. *Toxicon* 42:979–986.
- 1018 71. O'Brien DK, Melville SB. 2004. Effects of *Clostridium perfringens* alpha-toxin (PLC)  
1019 and perfringolysin O (PFO) on cytotoxicity to macrophages, on escape from the  
1020 phagosomes of macrophages, and on persistence of *C. perfringens* in host tissues.  
1021 *Infect Immun* 72:5204–5215.
- 1022 72. Sato H, Frank DW. 2004. ExoU is a potent intracellular phospholipase. *Mol*  
1023 *Microbiol* 53:1279–1290.
- 1024 73. Bhanot P, Schauer K, Coppens I, Nussenzweig V. 2005. A surface phospholipase  
1025 is involved in the migration of *Plasmodium* sporozoites through cells. *J Biol Chem*  
1026 280:6752–6760.
- 1027 74. Burda P-C, Roelli MA, Schaffner M, Khan SM, Janse CJ, Heussler VT. 2015. A  
1028 *Plasmodium* phospholipase is involved in disruption of the liver stage  
1029 parasitophorous vacuole membrane. *PLoS Pathog* 11:e1004760.

- 1030 75. Pszenny V, Ehrenman K, Romano JD, Kennard A, Schultz A, Roos DS, Grigg ME,  
1031 Carruthers VB, Coppens I. 2016. A Lipolytic Lecithin:Cholesterol Acyltransferase  
1032 Secreted by *Toxoplasma* Facilitates Parasite Replication and Egress. *J Biol Chem*  
1033 291:3725–3746.
- 1034 76. Daussy CF, Wodrich H. 2020. “Repair Me if You Can”: Membrane Damage,  
1035 Response, and Control from the Viral Perspective. *Cells* 9:E2042.
- 1036 77. Farr GA, Zhang L, Tattersall P. 2005. Parvoviral virions deploy a capsid-tethered  
1037 lipolytic enzyme to breach the endosomal membrane during cell entry. *Proc Natl*  
1038 *Acad Sci U S A* 102:17148–17153.
- 1039 78. Staring J, von Castelmur E, Blomen VA, van den Hengel LG, Brockmann M,  
1040 Baggen J, Thibaut HJ, Nieuwenhuis J, Janssen H, van Kuppeveld FJM, Perrakis A,  
1041 Carette JE, Brummelkamp TR. 2017. PLA2G16 represents a switch between entry  
1042 and clearance of Picornaviridae. *Nature* 541:412–416.
- 1043 79. Radulovic S, Troyer JM, Beier MS, Lau AO, Azad AF. 1999. Identification and  
1044 molecular analysis of the gene encoding *Rickettsia typhi* hemolysin. *Infect Immun*  
1045 67:6104–6108.
- 1046 80. Voss OH, Gillespie JJ, Lehman SS, Rennoll SA, Beier-Sexton M, Rahman MS,  
1047 Azad AF. 2020. Risk1, a Phosphatidylinositol 3-Kinase Effector, Promotes  
1048 *Rickettsia typhi* Intracellular Survival. *mBio* 11:e00820-20.

- 1049 81. Cheng Y-L, Wu Y-W, Kuo C-F, Lu S-L, Liu F-T, Anderson R, Lin C-F, Liu Y-L,  
1050 Wang W-Y, Chen Y-D, Zheng P-X, Wu J-J, Lin Y-S. 2017. Galectin-3 Inhibits  
1051 Galectin-8/Parkin-Mediated Ubiquitination of Group A *Streptococcus*. *mBio*  
1052 8:e00899-17.
- 1053 82. Engström P, Burke TP, Mitchell G, Ingabire N, Mark KG, Golovkine G, Iavarone  
1054 AT, Rape M, Cox JS, Welch MD. 2019. Evasion of autophagy mediated by  
1055 *Rickettsia* surface protein OmpB is critical for virulence. *Nat Microbiol* 4:2538–  
1056 2551.
- 1057 83. Engström P, Burke TP, Tran CJ, Iavarone AT, Welch MD. 2021. Lysine methylation  
1058 shields an intracellular pathogen from ubiquitylation and autophagy. *Sci Adv*  
1059 7:eabg2517.
- 1060 84. Saarikangas J, Zhao H, Lappalainen P. 2010. Regulation of the actin cytoskeleton-  
1061 plasma membrane interplay by phosphoinositides. *Physiol Rev* 90:259–289.
- 1062 85. Senju Y, Kalimeri M, Koskela EV, Somerharju P, Zhao H, Vattulainen I,  
1063 Lappalainen P. 2017. Mechanistic principles underlying regulation of the actin  
1064 cytoskeleton by phosphoinositides. *Proc Natl Acad Sci U S A* 114:E8977–E8986.
- 1065 86. Senju Y, Lappalainen P. 2019. Regulation of actin dynamics by PI(4,5)P2 in cell  
1066 migration and endocytosis. *Curr Opin Cell Biol* 56:7–13.
- 1067 87. Fukumatsu M, Ogawa M, Arakawa S, Suzuki M, Nakayama K, Shimizu S, Kim M,  
1068 Mimuro H, Sasakawa C. 2012. *Shigella* targets epithelial tricellular junctions and

- 1069 uses a noncanonical clathrin-dependent endocytic pathway to spread between  
1070 cells. *Cell Host Microbe* 11:325–336.
- 1071 88. Sanderlin AG, Vondrak C, Scricco AJ, Fedrigo I, Ahyong V, Lamason RL. 2019.  
1072 RNAi screen reveals a role for PACSIN2 and caveolins during bacterial cell-to-cell  
1073 spread. *Mol Biol Cell* 30:2124–2133.
- 1074 89. Czuczman MA, Fattouh R, van Rijn JM, Canadien V, Osborne S, Muise AM,  
1075 Kuchroo VK, Higgins DE, Brumell JH. 2014. *Listeria monocytogenes* exploits  
1076 efferocytosis to promote cell-to-cell spread. *Nature* 509:230–234.
- 1077 90. Dennis EA, Norris PC. 2015. Eicosanoid storm in infection and inflammation. *Nat*  
1078 *Rev Immunol*, 2015/07/03 ed. 15:511–523.
- 1079 91. Sheppe AEF, Edelmann MJ. 2021. Roles of Eicosanoids in Regulating  
1080 Inflammation and Neutrophil Migration as an Innate Host Response to Bacterial  
1081 Infections. *Infect Immun* 89:e0009521.
- 1082 92. Takano T, Clish CB, Gronert K, Petasis N, Serhan CN. 1998. Neutrophil-mediated  
1083 changes in vascular permeability are inhibited by topical application of aspirin-  
1084 triggered 15-epi-lipoxin A4 and novel lipoxin B4 stable analogues. *J Clin Invest*  
1085 101:819–826.
- 1086 93. Liu Z-M, Tucker AM, Driskell LO, Wood DO. 2007. *Mariner*-based transposon  
1087 mutagenesis of *Rickettsia prowazekii*. *Appl Environ Microbiol* 73:6644–6649.



- 1088 94. Choe, Julie. 2015. The *Rickettsia* Late Motility Factor Sca2 Exhibits Species  
1089 Differences in its Actin Assembly Mechanism. *University of California, Berkeley*.  
1090 Proquest ID: Choe\_berkeley\_0028E\_15819. Retrieved from  
1091 <https://escholarship.org/uc/item/9wd7s7vn>.
- 1092 95. Solovyev V, Salamov A. 2011. Automatic Annotation of Microbial Genomes and  
1093 Metagenomic Sequences. In *Metagenomics and its applications in agriculture,*  
1094 *biomedicine, and environmental studies* (Ed. R.W. Li). Nova Science Publisher's,  
1095 p.61-78.
- 1096 96. Mitra A, Kesarwani AK, Pal D, Nagaraja V. 2011. WebGeSTer DB--a transcription  
1097 terminator database. *Nucleic Acids Res* 39:D129-135.
- 1098 97. Winger JA, Derbyshire ER, Lamers MH, Marletta MA, Kuriyan J. 2008. The crystal  
1099 structure of the catalytic domain of a eukaryotic guanylate cyclase. *BMC Struct Biol*  
1100 8:42.
- 1101 98. Jeng RL, Goley ED, D'Alessio JA, Chaga OY, Svitkina TM, Borisy GG, Heinzen  
1102 RA, Welch MD. 2004. A *Rickettsia* WASP-like protein activates the Arp2/3 complex  
1103 and mediates actin-based motility. *Cell Microbiol* 6:761–769.
- 1104 99. Anacker RL, Mann RE, Gonzales C. 1987. Reactivity of monoclonal antibodies to  
1105 *Rickettsia rickettsii* with spotted fever and typhus group rickettsiae. *J Clin Microbiol*  
1106 25:167–171.
- 1107

1108 **Figures**

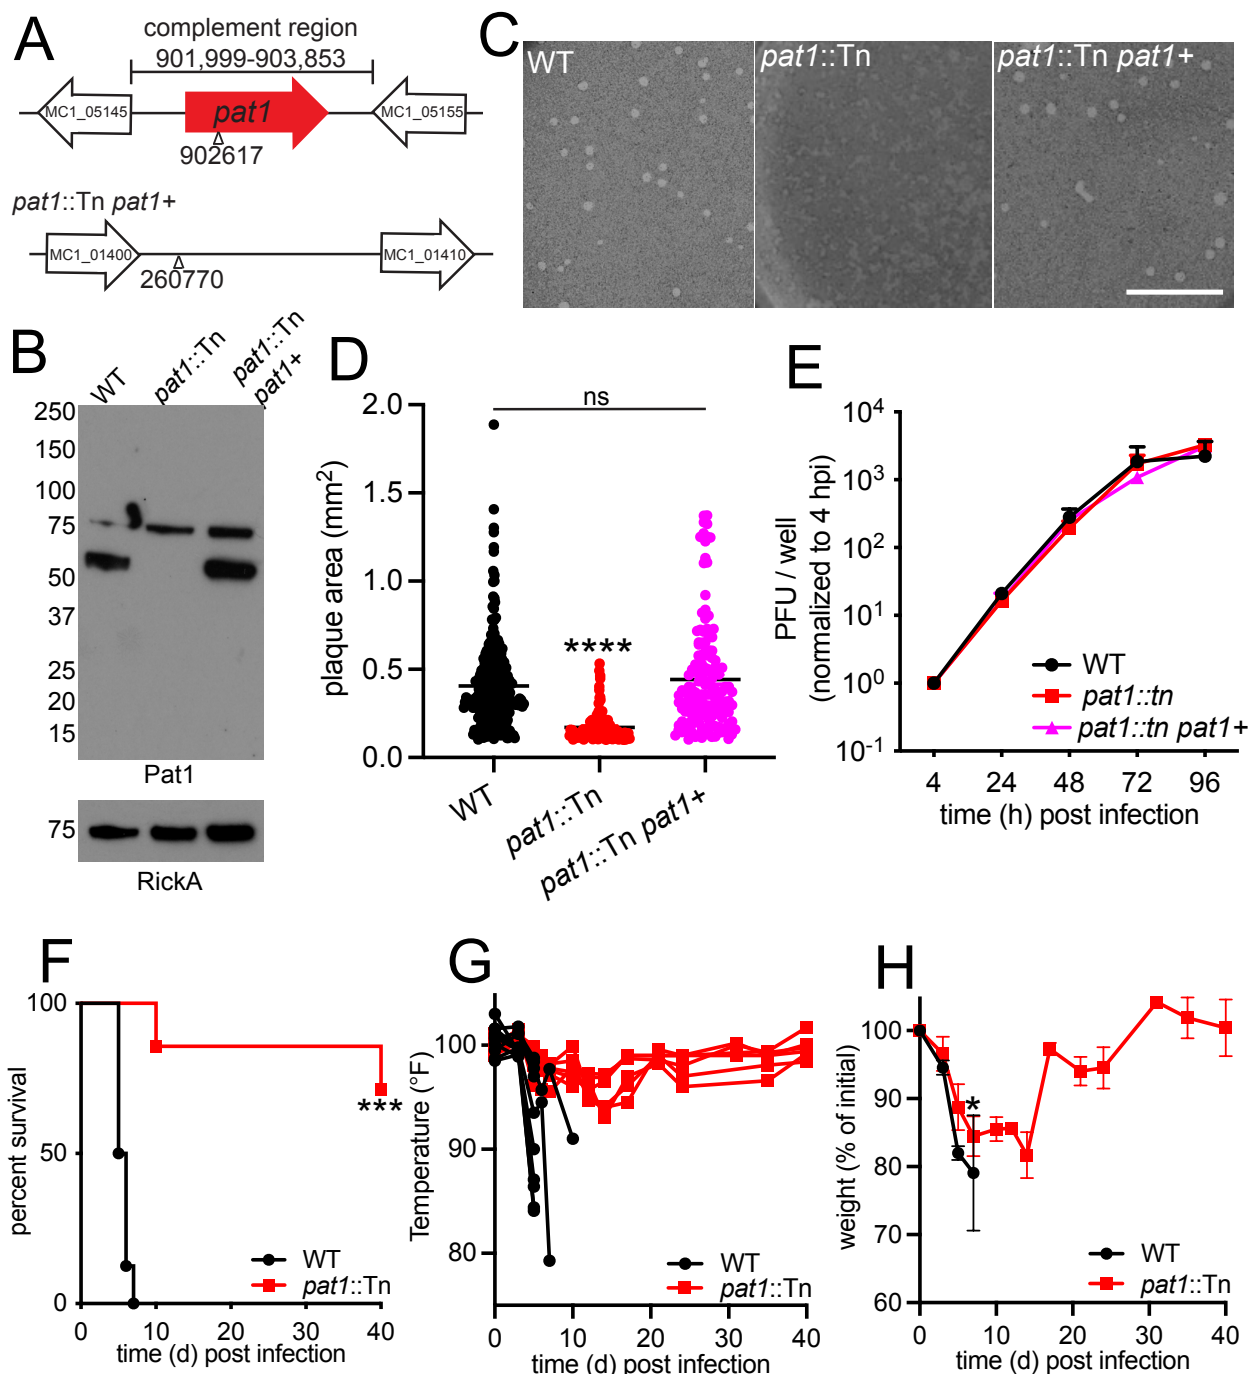

1109  
 1110 **Fig. 1 Pat1 is important for infection of cells and in mice.** (A) Genomic loci of *pat1*

1111 (top) and *pat1* insertion site for complementation (bottom). Triangle represents  
 1112 transposon insertion sites, and nucleotide numbers indicate the position in the *R.*  
 1113 *parkeri* genome. Genes upstream and downstream are included to show intergenic

1114 regions. (B) Western blot of purified *R. parkeri* strains, WT, *pat1::Tn*, and complemented  
1115 strain (*pat1::Tn pat1<sup>+</sup>*), probed with anti-Pat1 antibody; probing with anti-RickA was  
1116 used as a loading control. Pat1 has a predicted size of 55kD. Numbers on left are  
1117 molecular weight in kD. (C) Images of plaques stained with neutral red at 6 dpi. Scale  
1118 bar 10 mm. (D) Plaque areas in Vero cells infected with WT, *pat1::Tn*, and  
1119 complemented strain (n=2 independent experiments; 50-80 plaques per experiment).  
1120 (E) Growth curve of WT, *pat1::Tn*, and complemented strain in HMECs (n=3  
1121 independent experiments). (F) Survival of *Ifnar1<sup>-/-</sup>;Ifngr1<sup>-/-</sup>* mice infected intravenously  
1122 (i.v.) with 5x10<sup>6</sup> WT or *pat1::Tn* mutant (n=8 mice for WT, n=7 mice for *pat1::Tn*, data  
1123 represents 2 independent experiments). (G) Temperature changes over time in i.v.  
1124 infection of *Ifnar1<sup>-/-</sup>;Ifngr1<sup>-/-</sup>* mice with 5x10<sup>6</sup> WT or *pat1::Tn* mutant bacteria; graphs  
1125 represent data from individual mice. (H) Weight change over time expressed as percent  
1126 change from initial weight in i.v. infection of *Ifnar1<sup>-/-</sup>;Ifngr1<sup>-/-</sup>* mice with 5x10<sup>6</sup> WT or  
1127 *pat1::Tn* mutant bacteria. Data in (D) and (E) are mean ± SEM; \*\*\*\*p<0.0001 relative to  
1128 WT (one-way ANOVA), ns=not significant. Data in (F) were analyzed using a log-rank  
1129 (Mantel-Cox) test \*\*\*p<0.001. Data in (H) were analyzed using a two-way ANOVA from  
1130 0 to 7 dpi.

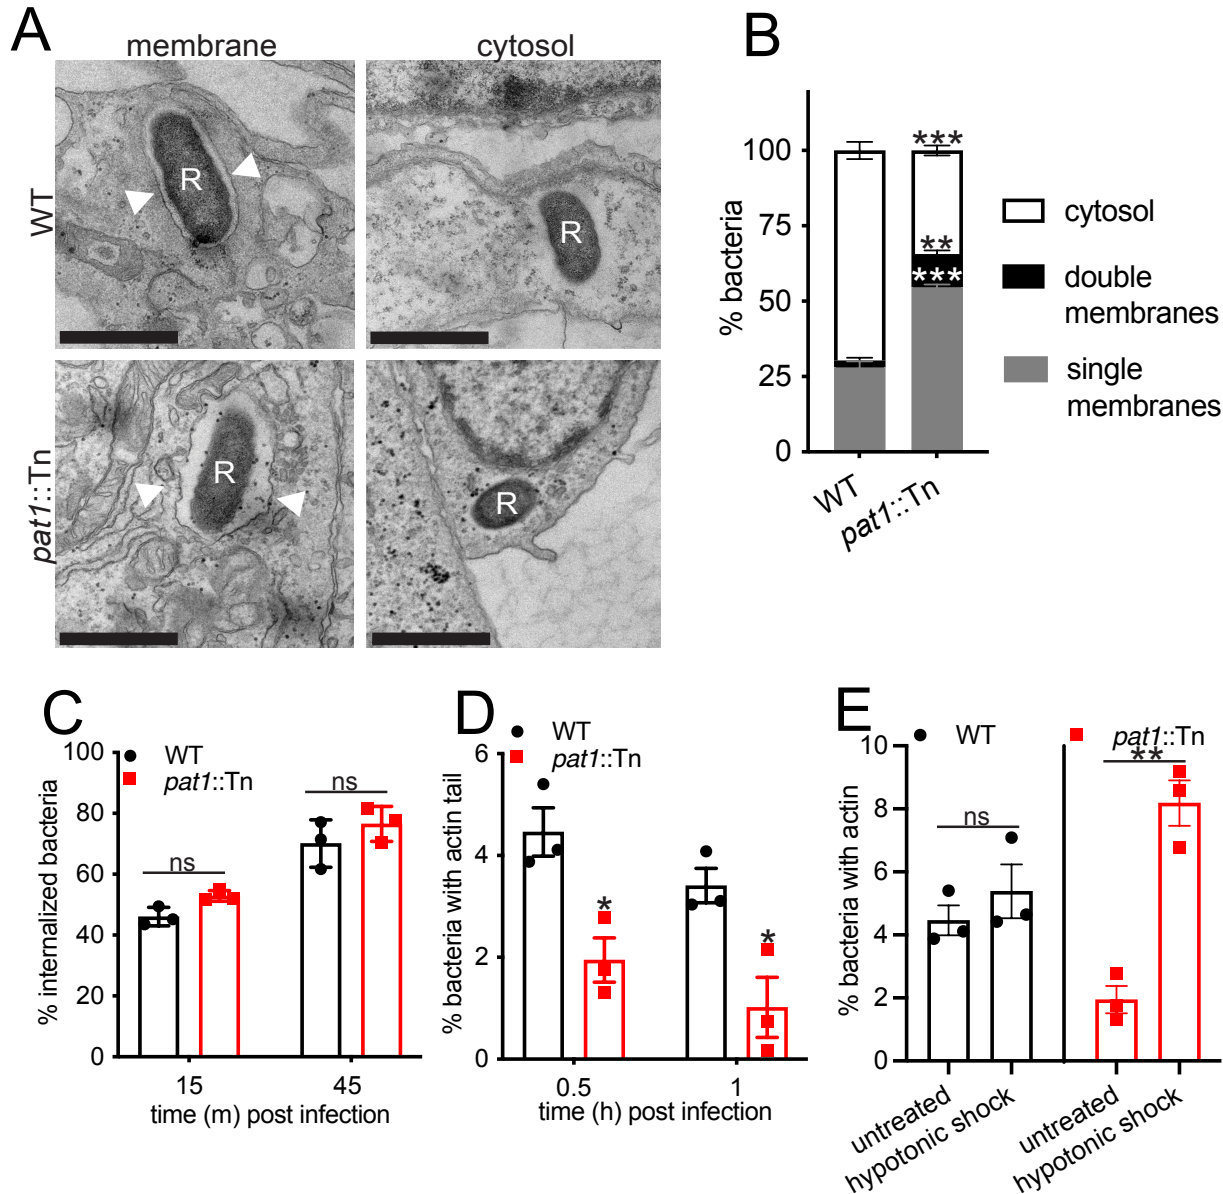

1131

1132 **Fig. 2 Pat1 facilitates escape from single and double membrane compartments**

1133 **following invasion.** (A) TEM images of WT and *pat1::Tn* mutant bacteria in HMECs at

1134 1 hpi. "R" indicates *R. parkeri* and arrowheads point to membrane surrounding the

1135 bacteria. Scale bar 1  $\mu$ m. (B) Quantification of (A), percentage of single and double

1136 membrane-bound or cytosolic bacteria (WT=80 bacteria, *pat1::Tn*=88 bacteria, n=3

1137 independent experiments). (C) Percent of bacteria internalized at 15 mpi and 45 mpi

1138 (images not shown). (D) Percent of bacteria with actin tails at 30 mpi and 1 hpi (images  
1139 not shown). (E) Percent of bacteria with actin in untreated cells or cells that have  
1140 undergone hypotonic shock treatment to lyse vacuoles (images not shown). All data  
1141 represents n=3 independent experiments. Data in (B, C, D) are mean  $\pm$  SEM;  
1142 \*\*\*p<0.001 \*\*p<0.01 \*p<0.05, ns=not significant relative to WT (unpaired t-test). Data in  
1143 (E) are mean  $\pm$  SEM; \*p<0.01 relative to untreated (paired t-test).

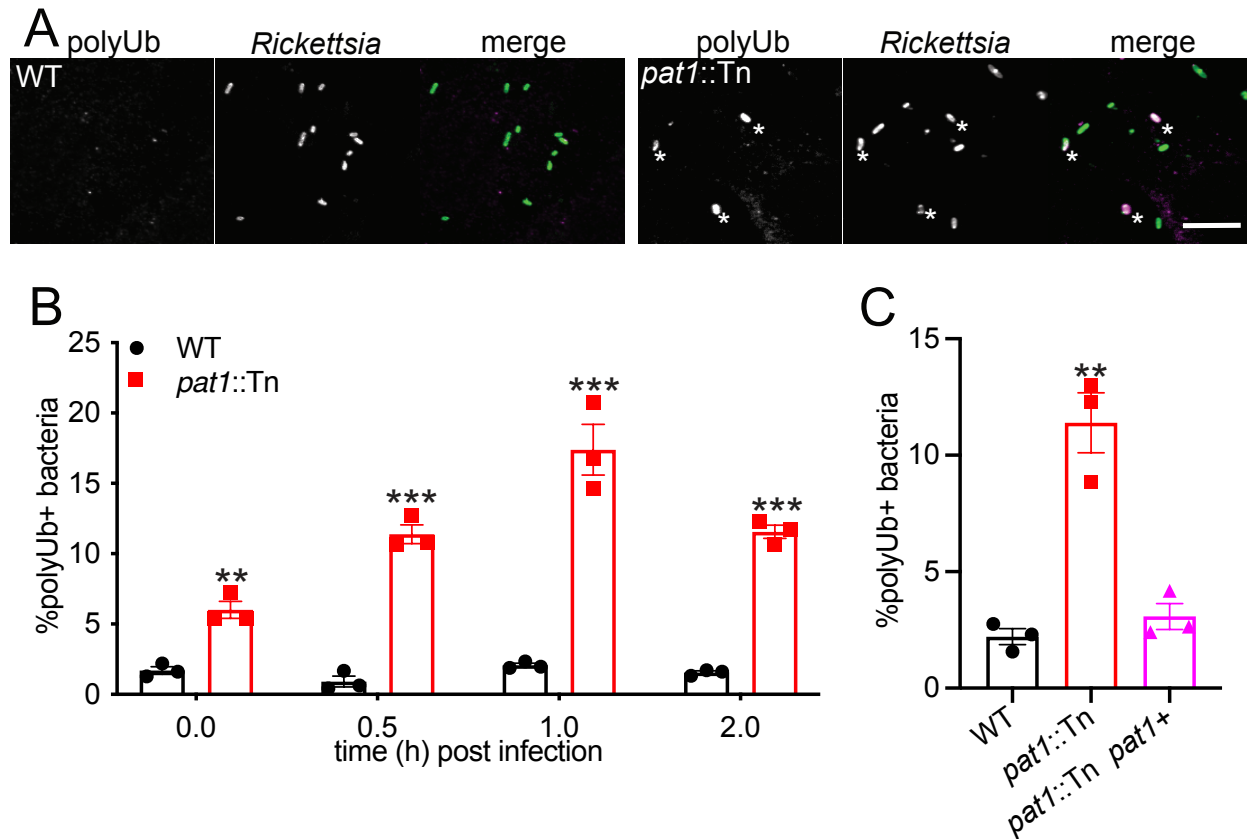

1144

1145 **Fig. 3 Pat1 contributes to avoidance of polyubiquitin recruitment.** (A) Images of  
1146 polyubiquitin (polyUb; magenta in merge) in HMECs infected with WT and *pat1::Tn*  
1147 bacteria (green in merge) at 1 hpi. Asterisk denotes colocalization between bacterium  
1148 and polyUb. Scale bar is 5  $\mu$ m. (B) Quantification of (A), percentage of polyUb-positive  
1149 bacteria at the indicated time points. (C) Percent of polyUb-positive bacteria in HMECs  
1150 infected with WT, *pat1::Tn*, or complemented mutant (*pat1::Tn pat1+*) at 1 hpi. All data  
1151 represent n=3 independent experiments. Data in (B) are mean  $\pm$  SEM; \*\*\*p<0.001  
1152 \*\*p<0.01 \*p<0.05 relative to WT (unpaired t-test). Data in (C) are mean  $\pm$  SEM;  
1153 \*\*\*p<0.001 \*\*p<0.01 \*p<0.05 relative to WT (one-way ANOVA).

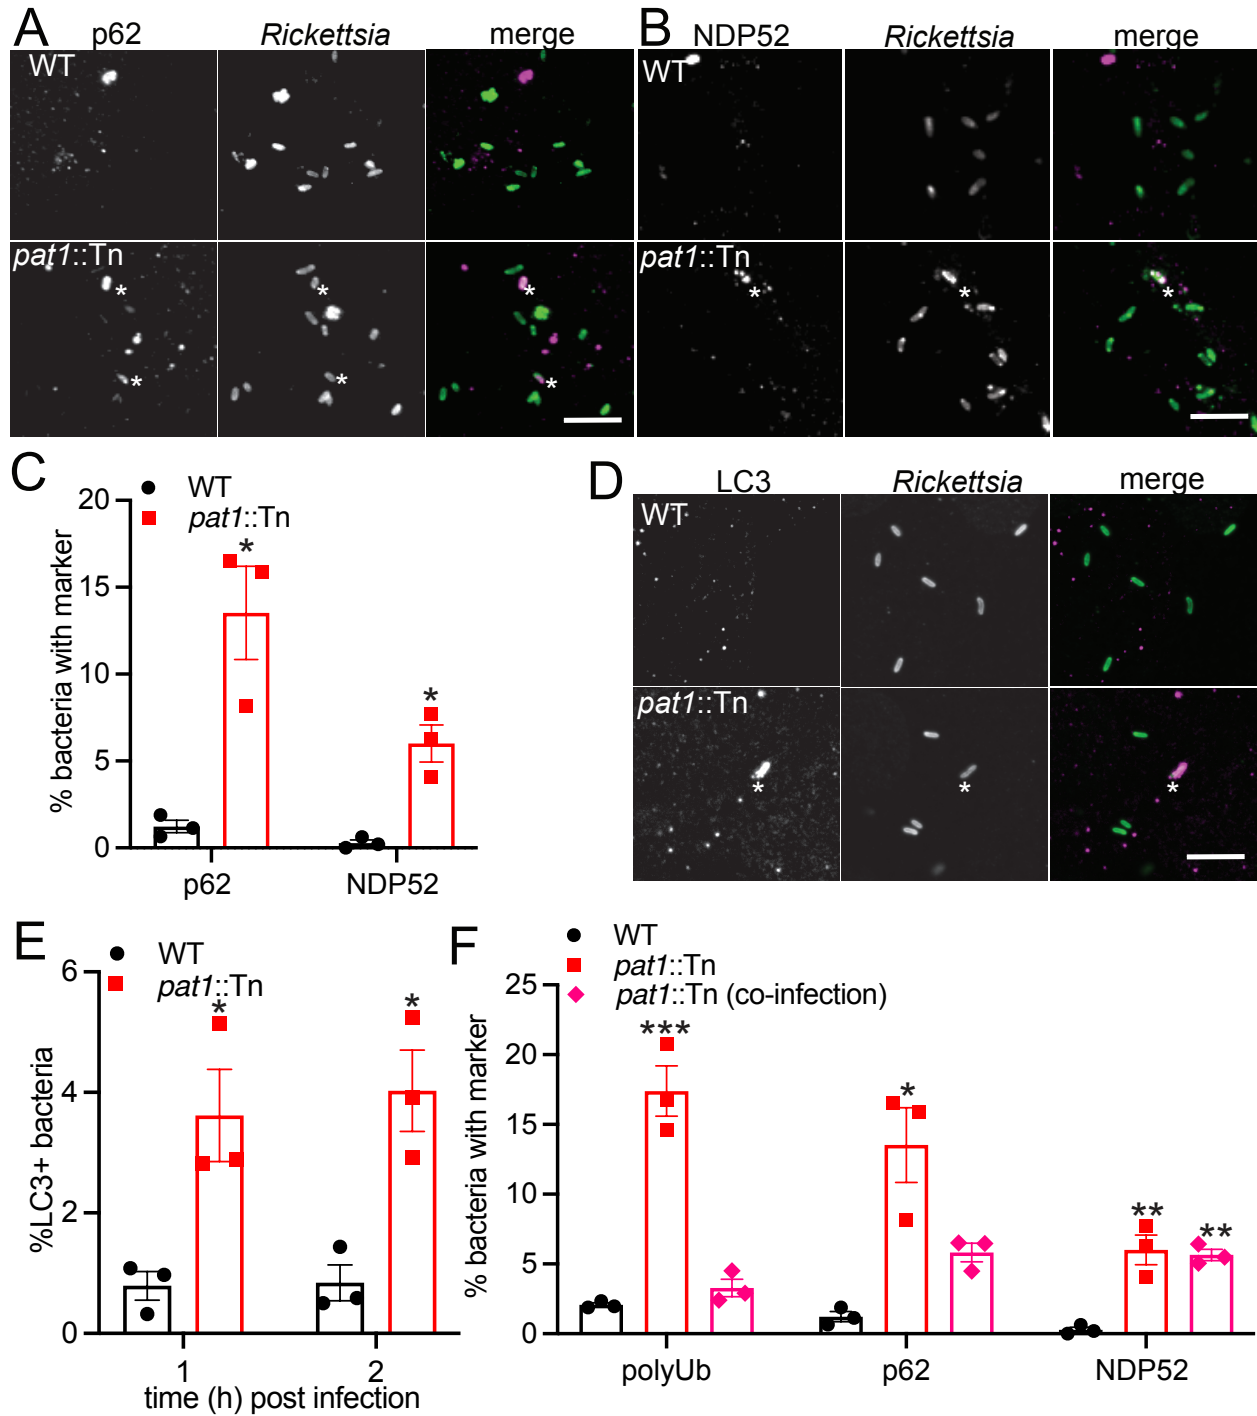

1154

1155 **Fig. 4 Pat1 enables evasion of recognition by autophagy.** Images of autophagy  
 1156 receptors (A) NDP52 (left; magenta in merge) and (B) p62 (right; magenta in merge) in  
 1157 WT and *pat1::Tn* (green in merge) infected HMECs. Asterisk denotes colocalization

1158 between bacterium and p62 or NDP52. (C) Quantification of (A) and (B), percentage of  
1159 bacteria staining for NDP52 or p62 at 1 hpi. (D) Images of LC3 (magenta) in HMECs  
1160 infected with WT and *pat1::Tn* bacteria (green) at 1 hpi. Asterisk denotes colocalization  
1161 between bacterium and LC3. (E) Quantification of percent bacteria staining for LC3 at 1  
1162 hpi (images in (D)) and 2 hpi (images not shown). (F) Percentage colocalization of  
1163 bacteria with polyUb, NDP52, and p62 in HMECs infected with WT, *pat1::Tn* mutant, or  
1164 co-infected with WT and *pat1::Tn* mutant. For co-infections, quantification is for *pat1::Tn*  
1165 bacteria only. All data represents n=3 independent experiments. Data in (C, E) are  
1166 mean  $\pm$  SEM; \*\*\*p<0.001 \*\*p<0.01 \*p<0.05 relative to WT (unpaired t-test). Data in (F)  
1167 are mean  $\pm$  SEM; \*\*\*p<0.001 \*\*p<0.01 \*p<0.05 relative to WT (one-way ANOVA). Scale  
1168 bars in (A, B, D) are 5  $\mu$ m.



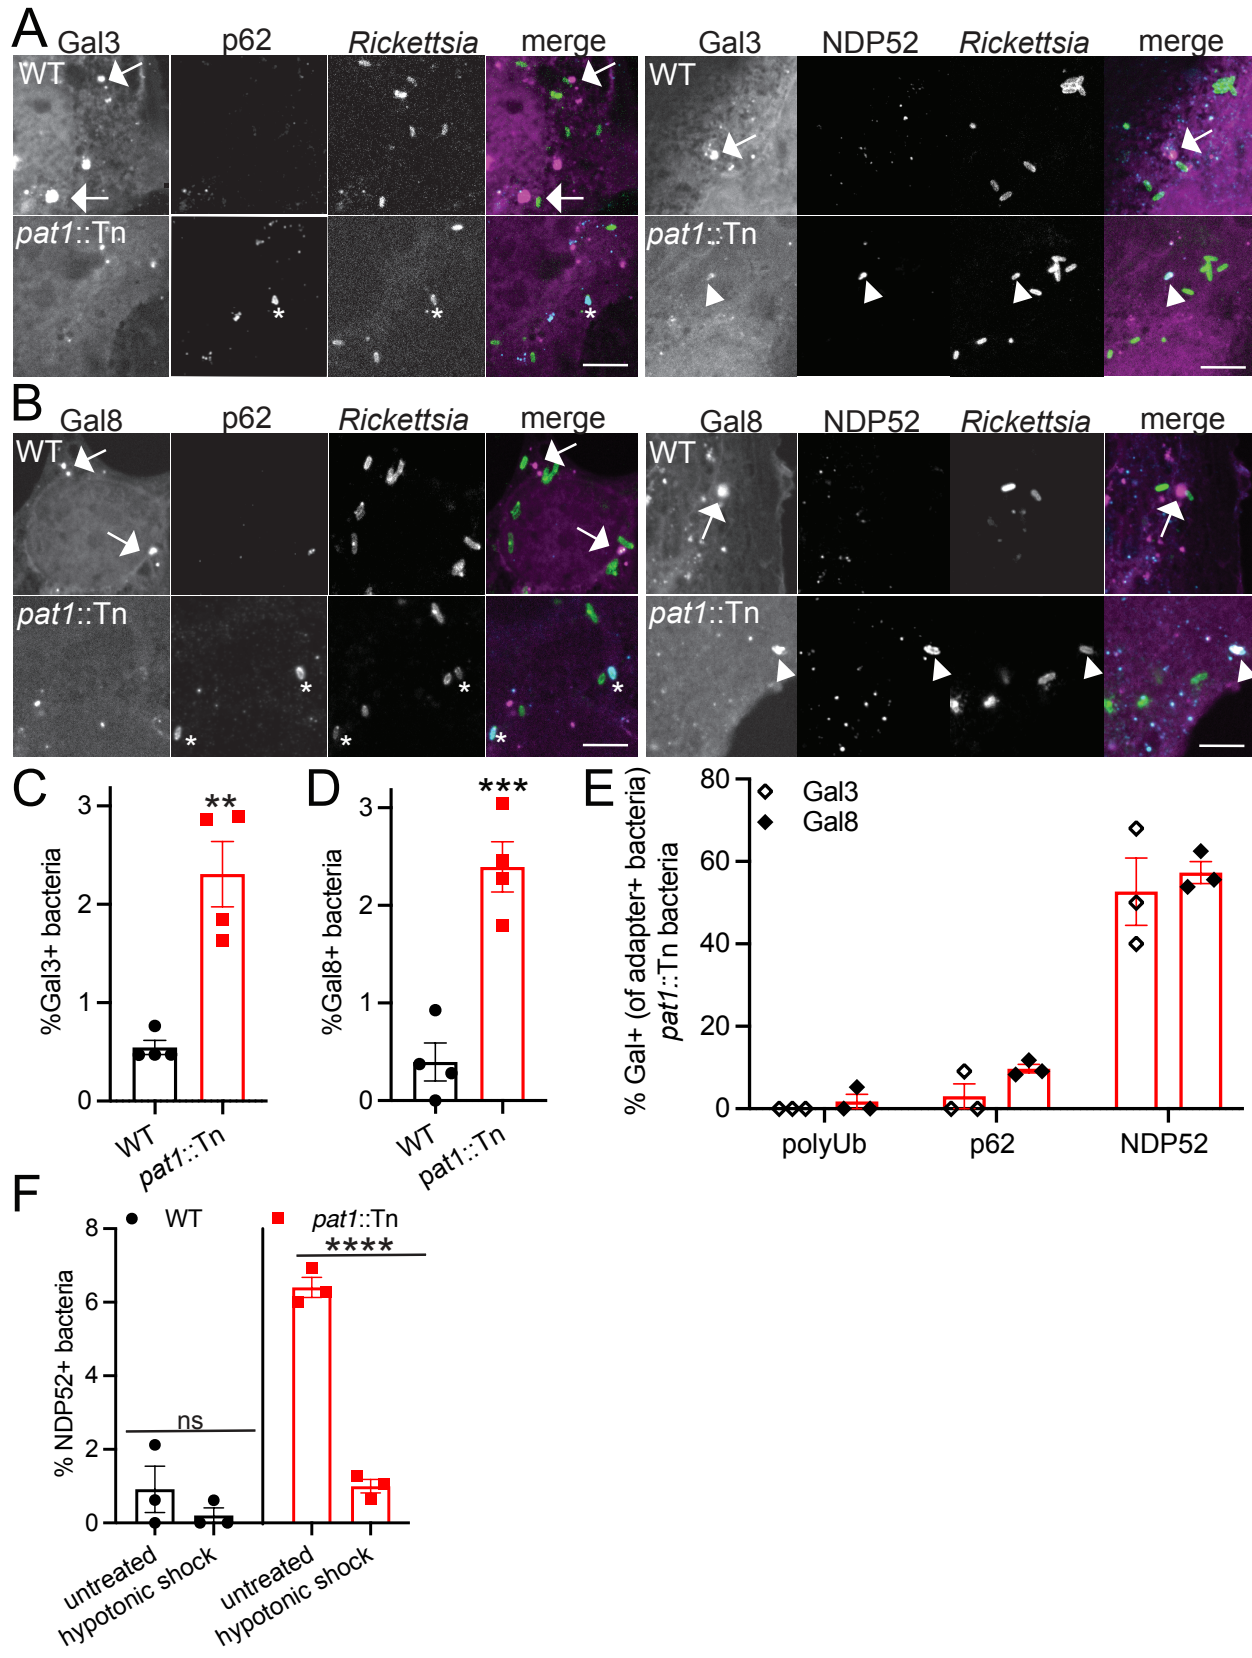

1170 **Fig. 5 Pat1 is important for avoiding bacterial association with damaged**  
1171 **membranes.** (A) Images of Gal3-mCherry (magenta in merge) and autophagy  
1172 receptors p62 (left; cyan in merge) and NDP52 (right; cyan in merge) in HMECs infected  
1173 with WT or *pat1::Tn* bacteria (green in merge) at 1 hpi. Arrows indicate large Gal3  
1174 positive clusters near bacteria, asterisk indicates bacteria that are p62 positive and Gal3  
1175 negative, arrowheads indicate colocalization between NDP52, Gal3, and bacteria. (B)  
1176 Images of Gal8-mCherry (magenta in merge) and autophagy receptors p62 (left; cyan in  
1177 merge) and NDP52 (right; cyan in merge) in HMECs infected with WT or *pat1::Tn*  
1178 bacteria (green in merge) at 1 hpi. Arrows indicate large Gal8 positive clusters near  
1179 bacteria, asterisk indicates bacteria that are p62 positive and Gal8 negative,  
1180 arrowheads indicate colocalization between NDP52, Gal8, and bacteria. Scale bar for  
1181 (A) is 5  $\mu\text{m}$  and (B) is 3  $\mu\text{m}$ . (C) Quantification of (A), percentage of bacteria positive for  
1182 Gal3 (n=4). (D) Quantification of (B), percentage of bacteria positive for Gal8 (n=4). (E)  
1183 Quantification of (A) and (B), percent of polyUb, p62, or NDP52 positive *pat1::Tn*  
1184 bacteria that are also positive for Gal3 (open diamond) or Gal8 (filled diamond) (n=3 for  
1185 all markers). (F) Percent of bacteria positive for NDP52 in untreated cells or cells that  
1186 undergo hypotonic lysis of vesicles (n=3). Data in (C) and (D) represent n=4  
1187 independent experiments and data in (E) and (F) represent n=3 independent  
1188 experiments. Data in (C), (D) are mean  $\pm$  SEM; \*\*\*p<0.001 \*\*p<0.01 relative to WT  
1189 (unpaired t-test). Data in (F) are mean  $\pm$  SEM; \*\*p<0.01 relative to untreated (paired t-  
1190 test).

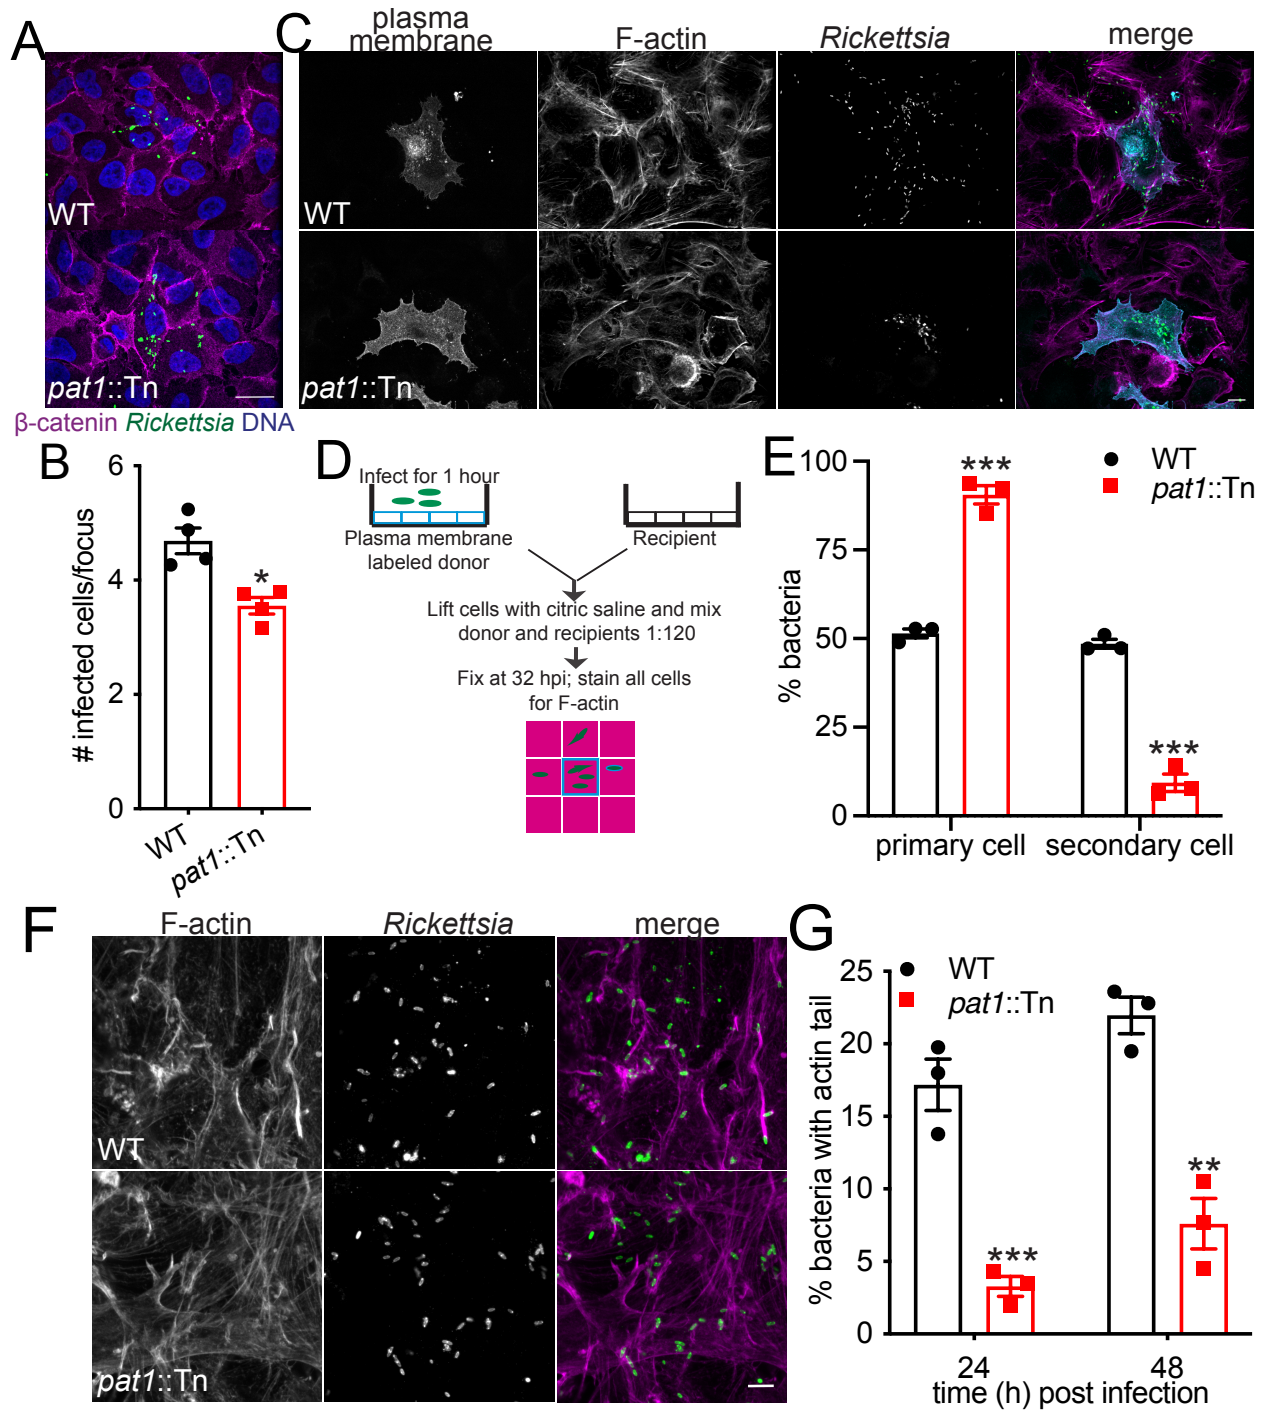

1191

1192 **Fig. 6 Pat1 is important for cell-cell spread and facilitates actin-based motility. (A)**

1193 Images of infectious foci formed by WT or *pat1::Tn* mutant in A549 cells at 28 hpi

1194 (magenta, β-catenin; green, bacteria; blue, nuclei). Scale bar is 10 μm. (B)

1195 Quantification of (A), number of infected cells per focus (n=4). (C) Images of mixed cell

1196 assay depicted in (D) showing plasma membrane (A549-TRTF; cyan in merge), F-actin  
1197 (magenta in merge), and bacteria (green in merge), adapted from (67). Scale bar is 10  
1198  $\mu\text{m}$ . (E) Percent bacteria in primary and secondary cells quantified from (C) (n=3). (F)  
1199 Images of actin tails (F-actin; magenta in merge) and bacteria (green in merge) in  
1200 HMECs at 24 hpi. (G) Percent of bacteria with actin tails at 24 hpi (from (F) and 48 hpi  
1201 in HMECs (images not shown) (n=3). Scale bar is 5  $\mu\text{m}$ . Data in (B) represents n=4  
1202 independent experiments and data in (E) and (G) represent n=3 independent  
1203 experiments. All data are mean  $\pm$  SEM; \*\*\*p<0.001 \*\*p<0.01 \*p<0.05 relative to WT  
1204 (unpaired t-test).



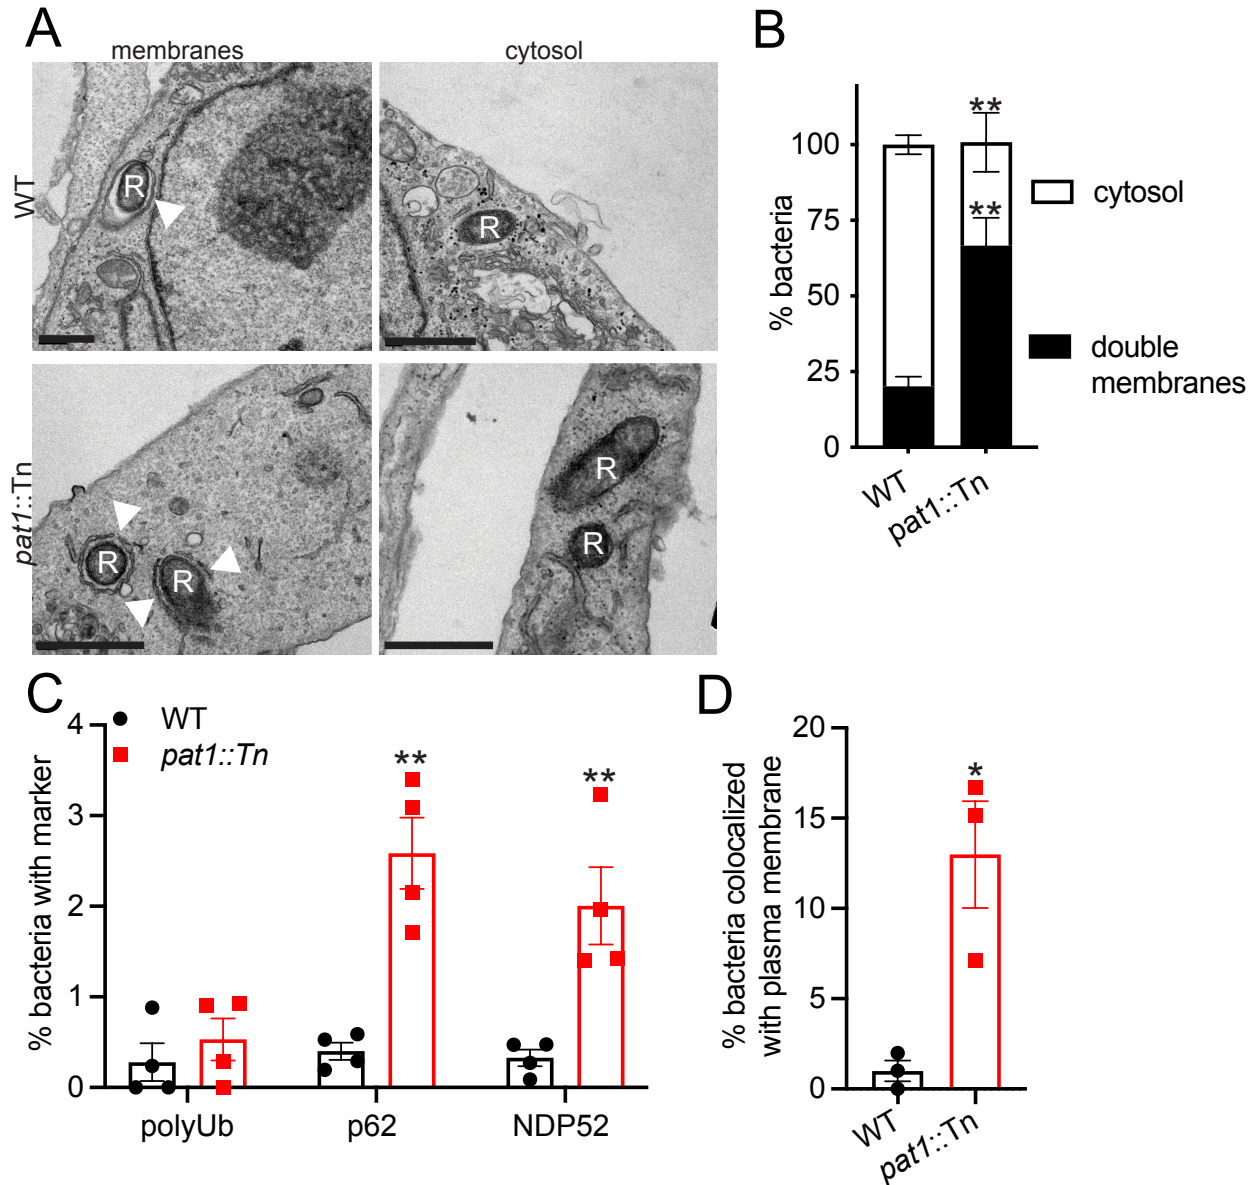

1205

1206 **Fig. 7 Pat1 is important for escape from the secondary vacuole.** (A) TEM images of

1207 WT and *pat1::Tn* mutant bacteria in HMECs at 48 hpi. "R" indicates *R. parkeri* and

1208 arrowheads point membranes surrounding the bacteria. Scale bar 1  $\mu$ m. (B) Percentage

1209 of bacteria in double membrane compartments or in the cytosol (WT n=120 bacteria,

1210 *pat1::tn* n=112 bacteria, n=3 independent experiments). (C) Percentage of bacteria in

1211 the secondary cell that colocalize with the plasma membrane from the primary cell, in

- 1212 mixed cell assays from Figure 5C at 32 hpi (n=3 independent experiments). (D)
- 1213 Percentage of WT and *pat1::Tn* mutant bacteria colocalizing with polyUb, p62, and
- 1214 NDP52 (all n=4 independent experiments) at 48 hpi in HMECs. All data are mean  $\pm$
- 1215 SEM; \*\*p<0.01 \*p<0.05 relative to WT (unpaired t-test).
